# Supplementary material for: Functional convergence of genomic and transcriptomic architecture underlies schooling behaviour in a live-bearing fish
Source: PubMed Central journal article supplement (PMC10781616; doi:10.1038/s41559-023-02249-9), 2023-11-20
Supplement: 41559_2023_2249_MOESM1_ESM.pdf [file 41559_2023_2249_MOESM1_ESM.pdf]

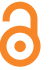

---

# Functional convergence of genomic and transcriptomic architecture underlies schooling behaviour in a live-bearing fish

---

In the format provided by the authors and unedited

## Supplementary Figures

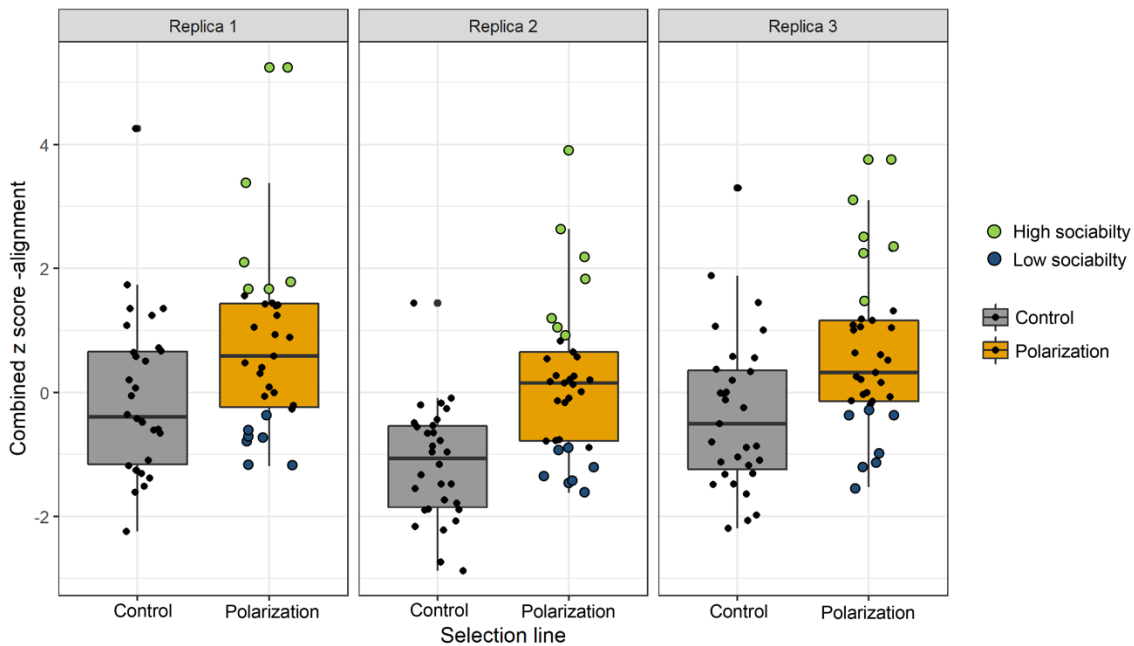

**Supplementary Figure 1.** Mean score for alignment to group direction in females for each of the 195 families measured when evaluating the heritability of sociability by means of open field tests in which guppies from three independently replicated polarization-selected (orange,  $n = 100$ ) and control (gray,  $n = 95$ ) lines were exposed to a group of other seven conspecifics. We obtained combined Z scores by standardizing independently alignment scores obtained in maternal and offspring generations and by adding the score of the mother to the mean score of all female offspring measure in each family. For all boxplots, horizontal lines indicate medians, boxes indicate the interquartile range, and whiskers indicate all points within 1.5 times the interquartile range. Colored circles indicate families that were further used for genomic analyses. Source data are provided as a Source Data file.

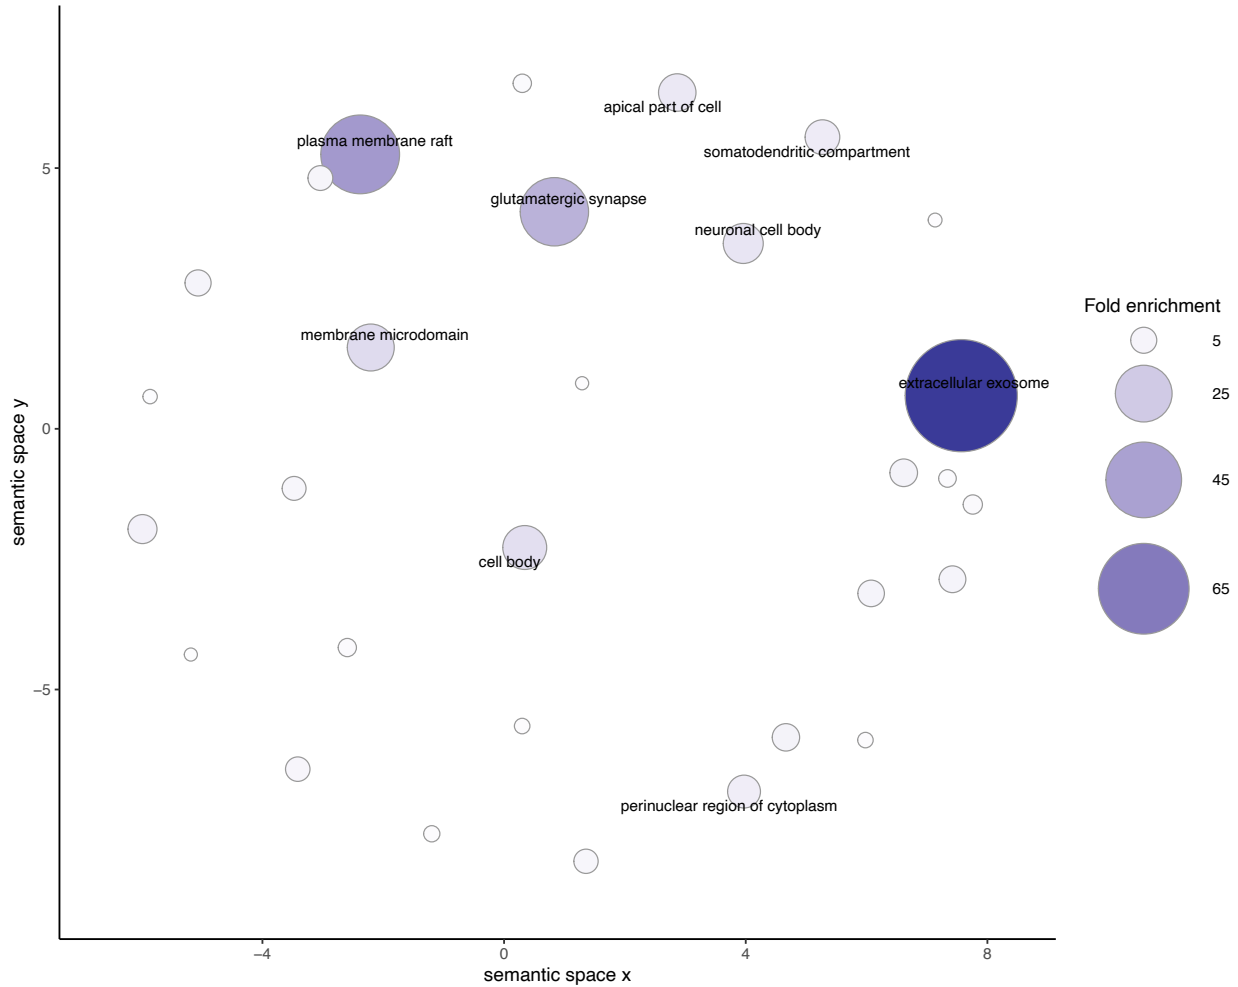

**Supplementary Figure 2.** Clustering of statistically significant overrepresented Gene Ontology annotations for cellular components associated to differences between high and low sociability in guppies. Point size and color provide information on fold enrichment value from the statistical overrepresentation test performed in PANTHER<sup>1</sup>. Terms with fold enrichment lower than eight are represented but not described in text. Axes have no intrinsic meaning and are based on multidimensional scaling which cluster terms based on semantic similarities<sup>2</sup>. Source data are provided as a Source Data file.

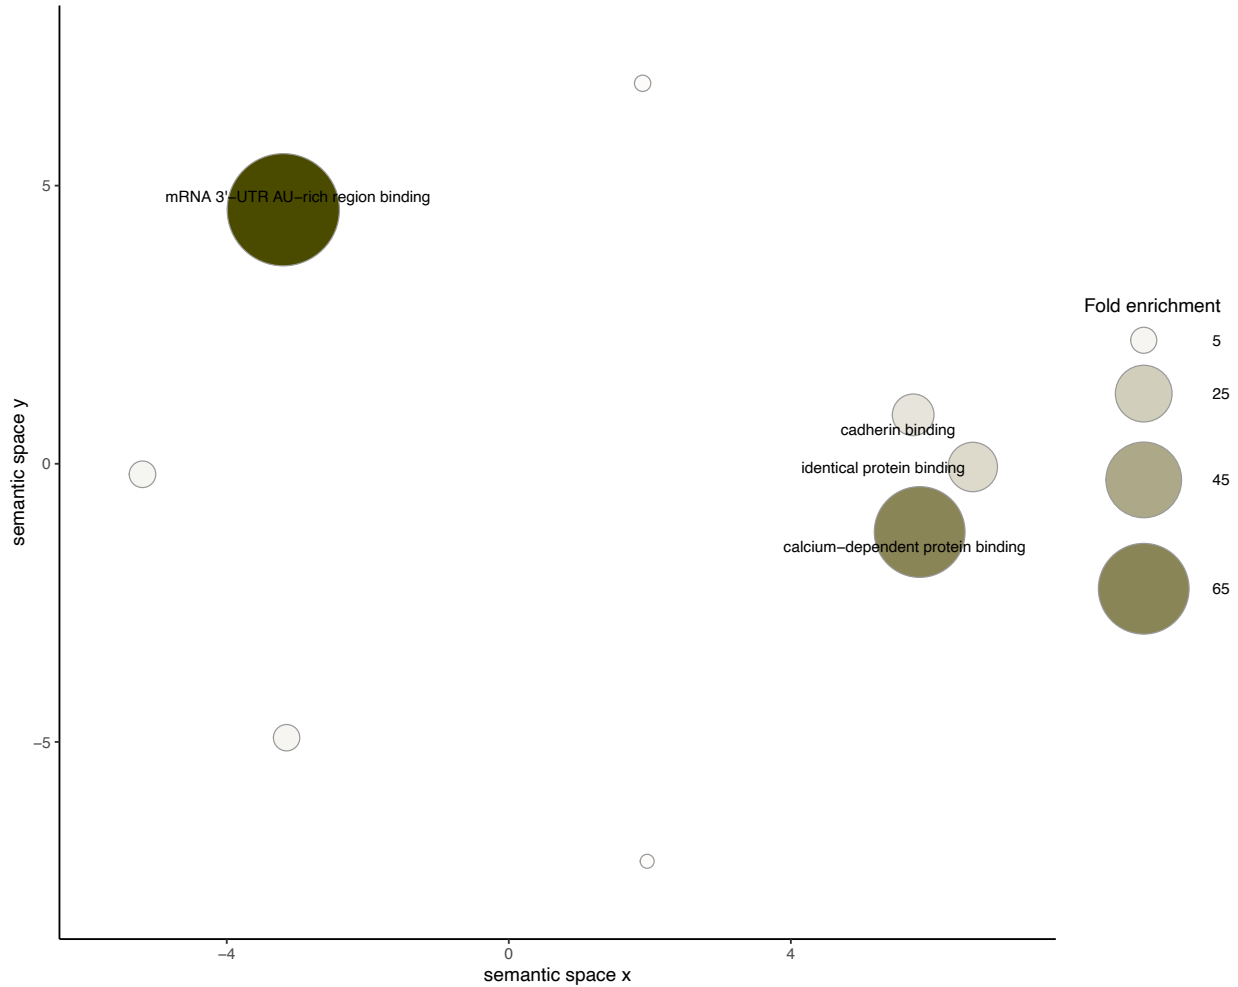

**Supplementary Figure 3.** Clustering of statistically significant overrepresented Gene Ontology annotations for molecular functions associated to differences between high and low sociability in guppies. Point size and color provide information on fold enrichment value from the statistical overrepresentation test performed in PANTHER<sup>1</sup>. Terms with fold enrichment lower than eight are represented but not described in text. Axes have no intrinsic meaning and are based on multidimensional scaling which cluster terms based on semantic similarities<sup>2</sup>. Source data are provided as a Source Data file.

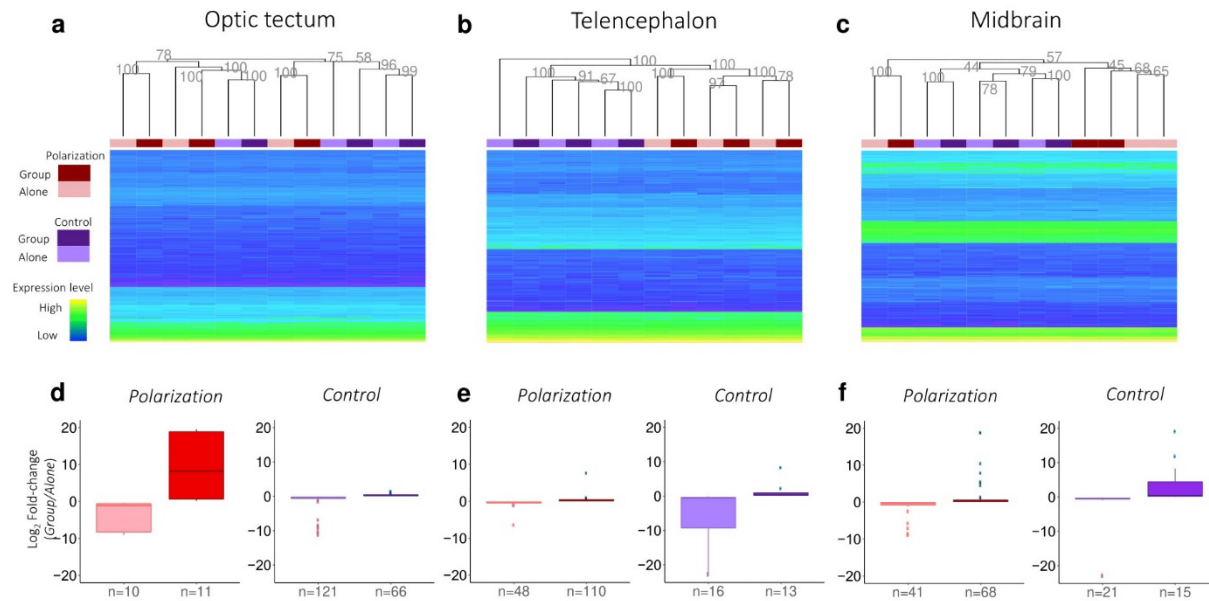

**Supplementary Figure 4. Top panels:** Hierarchical clustering of gene expression across all significantly expressed genes in the optic tectum (a), telencephalon (b) and midbrain (c) for polarization-selected selection and control lines. Values on top of nodes correspond to Approximately Unbiased bootstrap values. Heatmap represents expression of 500 randomly selected genes. **Bottom panels:** Boxplots of average log<sub>2</sub> fold-change for all genes differentially expressed genes between the *Alone* and the *Group* conditions in polarization-selected and control lines for optic tectum (d), telencephalon (e) and midbrain (f). Sample size for each selection/treatment/tissue combination is provided in x-axis. Boxes correspond to 25<sup>th</sup> - 75<sup>th</sup> percentiles, whiskers indicate all points within 1.5 times the interquartile range. Sample sizes on the x-axis indicate number of genes with relative up- or down-regulation. Source data are provided as a Source Data file.

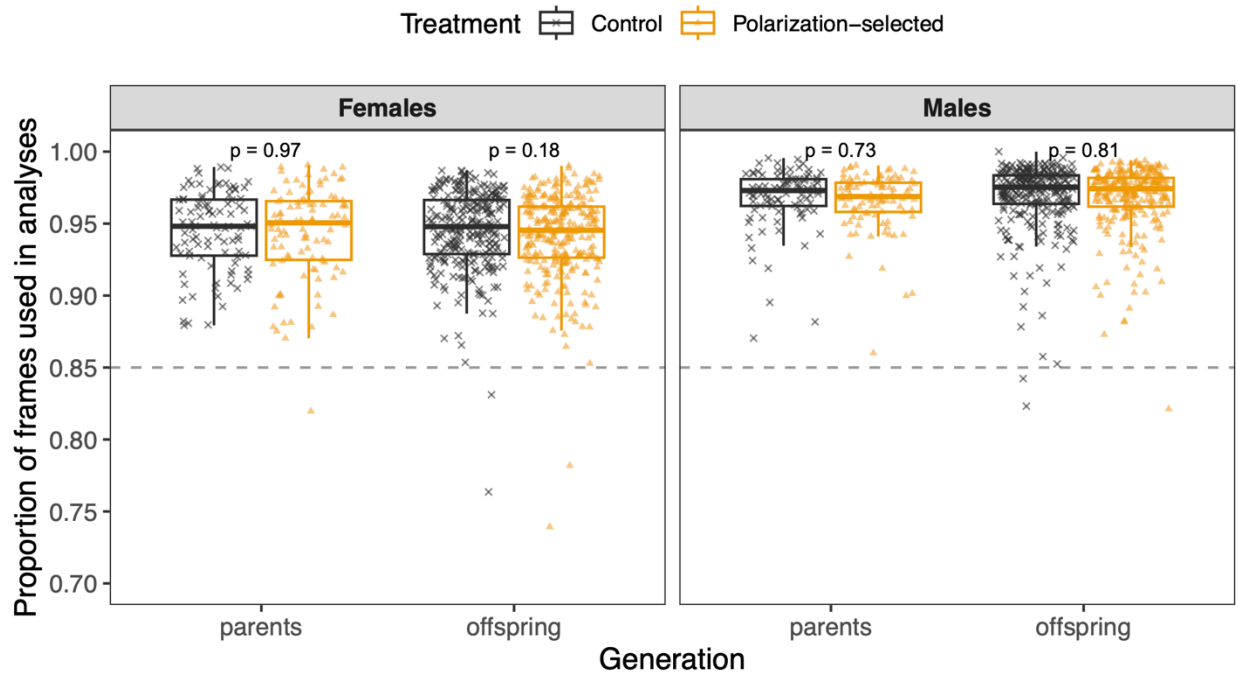

**Supplementary Figure 5.** Proportion of frames obtained from idTracker software in tracking from videos recorded for groups of seven wild-type guppies and one individual from either polarization-selected or control selection lines. Tracking data was used next for the quantification of alignment, attraction and speed in parents and six offspring of 195 families (Polarization-selected:  $n = 763$ ; Control:  $n = 724$ ). We found no significant differences for the proportion of frames used for videos used for polarization-selected and control lines in a Linear Mixed Model that included generation, sex and selection line as fixed factors ( $LMM_{frames: line: F = 0.82; df = 1464; p = 0.37}$ ). Horizontal lines indicate medians, boxes indicate the interquartile range, and whiskers indicate all points within 1.5 times the interquartile range. P-values in top position of each comparison indicate values for statistical contrasts of the model by sex and generation. Consistency in identity assigned by idTracker was verified in trials with less than 85% frames tracked (dashed line). Source data are provided as a Source Data file.

## Supplementary Tables

**Supplementary Table 1.** Statistical results for a Linear Mixed Model comparing the alignment and attraction of polarization-selected (n = 763) and control (n = 724) female guppies when swimming with groups of same-sex non-kin conspecifics. In bold p-values lower than 0.05 (see Supplementary code on shoaling patterns analyses).

| <b>Alignment to group</b>                            |                  |               |                  |                  |           |
|------------------------------------------------------|------------------|---------------|------------------|------------------|-----------|
| <i>Predictors</i>                                    | <i>Estimates</i> | <i>CI</i>     | <i>Statistic</i> | <i>p</i>         | <i>df</i> |
| (Intercept)                                          | 0.19             | 0.13 – 0.24   | 6.78             | <b>&lt;0.001</b> | 1385.81   |
| Selection line [polarization]                        | 0.01             | 0.00 – 0.01   | 2.27             | <b>0.047</b>     | 9.68      |
| Sex [males]                                          | -0.01            | -0.01 – -0.00 | -3.02            | <b>0.003</b>     | 690.08    |
| Generation [parental]                                | -0.02            | -0.02 – -0.01 | -10.13           | <b>&lt;0.001</b> | 1141.24   |
| Average alignment of group                           | 0.79             | 0.72 – 0.86   | 22.71            | <b>&lt;0.001</b> | 1436.72   |
| Average speed of group                               | 0.00             | 0.00 – 0.00   | 0.20             | 0.842            | 1429.55   |
| Selection line [polarization] *<br>Sex [males]       | 0.00             | -0.00 – 0.00  | 0.20             | 0.842            | 1429.55   |
| ICC                                                  | 0.12             |               |                  |                  |           |
| N <sub>line</sub>                                    | 2                |               |                  |                  |           |
| N <sub>rep</sub>                                     | 3                |               |                  |                  |           |
| N <sub>testnr</sub>                                  | 8                |               |                  |                  |           |
| N <sub>sex</sub>                                     | 2                |               |                  |                  |           |
| N <sub>family</sub>                                  | 195              |               |                  |                  |           |
| Observations                                         | 1487             |               |                  |                  |           |
| Marginal R <sup>2</sup> / Conditional R <sup>2</sup> | 0.657 / 0.697    |               |                  |                  |           |

| <b>Nearest neighbour distance (attraction)</b> |                  |               |                  |                  |           |
|------------------------------------------------|------------------|---------------|------------------|------------------|-----------|
| <i>Predictors</i>                              | <i>Estimates</i> | <i>CI</i>     | <i>Statistic</i> | <i>p</i>         | <i>df</i> |
| (Intercept)                                    | 2.64             | 2.56 – 2.71   | 65.62            | <b>&lt;0.001</b> | 565.12    |
| Selection line [polarization]                  | -0.04            | -0.08 – -0.00 | -2.33            | <b>0.044</b>     | 9.34      |

|                                                      |               |              |       |                |         |
|------------------------------------------------------|---------------|--------------|-------|----------------|---------|
| Sex [males]                                          | 0.01          | -0.02 – 0.04 | 0.55  | 0.583          | 448.53  |
| Generation [parental]                                | 0.12          | 0.10 – 0.14  | 11.31 | < <b>0.001</b> | 984.50  |
| Average alignment of group                           | 0.02          | 0.02 – 0.02  | 27.31 | < <b>0.001</b> | 1408.27 |
| Average speed of group                               | 0.00          | 0.00 – 0.00  | 3.74  | < <b>0.001</b> | 566.82  |
| Selection line [polarization] * Sex [males]          | 0.03          | -0.02 – 0.07 | 1.24  | 0.217          | 371.59  |
| ICC                                                  | 0.13          |              |       |                |         |
| N <sub>line</sub>                                    | 2             |              |       |                |         |
| N <sub>rep</sub>                                     | 3             |              |       |                |         |
| N <sub>testnr</sub>                                  | 8             |              |       |                |         |
| N <sub>sex</sub>                                     | 2             |              |       |                |         |
| N <sub>family</sub>                                  | 195           |              |       |                |         |
| Observations                                         | 1487          |              |       |                |         |
| Marginal R <sup>2</sup> / Conditional R <sup>2</sup> | 0.471 / 0.538 |              |       |                |         |

**Supplementary Table 2.** Independent contrasts of a Linear Mixed Model evaluating potential differences between polarization-selected (P, n = 763) and control (C, n = 724) guppies in their alignment and nearest neighbor distance (attraction) when swimming with groups of same-sex non-kin conspecifics (see Supplementary code on shoaling patterns analyses).

### Alignment

| <i>contrast</i> | <i>sex</i> | <i>estimate</i> | <i>SE</i> | <i>df</i> | <i>t.ratio</i> | <i>p.value</i> |
|-----------------|------------|-----------------|-----------|-----------|----------------|----------------|
| C - P           | females    | -0.006          | 0.002     | 9.68      | -2.269         | <b>0.047</b>   |
| C - P           | males      | -0.003          | 0.002     | 9.56      | 1.378          | 0.20           |

### Attraction

| <i>contrast</i> | <i>treatment</i> | <i>estimate</i> | <i>SE</i> | <i>df</i> | <i>t.ratio</i> | <i>p.value</i> |
|-----------------|------------------|-----------------|-----------|-----------|----------------|----------------|
| C - P           | females          | 0.042           | 0.001     | 9.34      | 2.331          | <b>0.043</b>   |
| C - P           | males            | 0.015           | 0.002     | 9.26      | 0.883          | 0.40           |



**Supplementary Table 3.** Mean body size of guppies used to estimate the heritability of alignment and attraction at the time of testing across sexes and generations. Values are provided in number of pixels obtained from idTracker data using a custom script implemented in Matlab (v2020a) that extracts body size data accounting for changes in apparent size between the middle and edge of the experimental arena used for video recordings.

| <b>Generation</b> | <b>Selection line</b> | <b>Sex</b> | <b>Mean body size (pixels)</b> | <b>SE</b> |
|-------------------|-----------------------|------------|--------------------------------|-----------|
| Parents           | Control               | Females    | 410                            | 47        |
|                   |                       | Males      | 192                            | 29        |
|                   | Polarization-selected | Females    | 416                            | 71        |
|                   |                       | Males      | 189                            | 37        |
| Offspring         | Control               | Females    | 247                            | 55        |
|                   |                       | Males      | 158                            | 33        |
|                   | Polarization-selected | Females    | 251                            | 60        |
|                   |                       | Males      | 160                            | 26        |

**Supplementary Table 4.** Results from Bayesian animal models only accounting for same-sex pedigree relationships. We obtained heritability estimates by taking the ratio of the additive genetic variance to the total phenotypic variance (additive genetic variance + group variance + population variance + residual variance) in each independent model.

### ALIGNMENT

| FEMALES                   |                     |          |           |       |        |
|---------------------------|---------------------|----------|-----------|-------|--------|
| Parameter group           | Parameter           | Estimate | Est.Error | Q2.5  | Q97.5  |
| Fixed effects             | Intercept           | 0.504    | 0.074     | 0.359 | 0.648  |
| Fixed effects             | linesocial          | 0.157    | 0.102     | -0.04 | 0.355  |
| Fixed effects             | generationparents   | -0.277   | 0.058     | -0.39 | -0.163 |
| Fixed effects             | speed_std           | 0.396    | 0.023     | 0.35  | 0.441  |
| Additive genetic variance | Intercept           | 0.162    | 0.042     | 0.086 | 0.25   |
| Group                     | Intercept           | 0.005    | 0.006     | 0     | 0.02   |
| Population                | Intercept           | 0.01     | 0.027     | 0     | 0.064  |
| Residual variance         | NA                  | 0.304    | 0.037     | 0.234 | 0.379  |
|                           | <b>Heritability</b> | 0.336    | 0.079     | 0.183 | 0.494  |

### MALES

| Parameter group           | Parameter           | Estimate | Est.Error | Q2.5   | Q97.5  |
|---------------------------|---------------------|----------|-----------|--------|--------|
| Fixed effects             | Intercept           | -0.452   | 0.125     | -0.694 | -0.213 |
| Fixed effects             | linesocial          | 0.093    | 0.172     | -0.231 | 0.425  |
| Fixed effects             | generationparents   | -0.502   | 0.071     | -0.641 | -0.362 |
| Fixed effects             | speed_std           | 0.298    | 0.039     | 0.221  | 0.376  |
| Additive genetic variance | Intercept           | 0.031    | 0.026     | 0.000  | 0.091  |
| Group                     | Intercept           | 0.04     | 0.016     | 0.013  | 0.074  |
| Population                | Intercept           | 0.039    | 0.091     | 0.001  | 0.207  |
| Residual variance         | NA                  | 0.390    | 0.033     | 0.323  | 0.453  |
|                           | <b>Heritability</b> | 0.063    | 0.052     | 0.000  | 0.184  |

### ATTRACTION

| FEMALES                   |                   |          |           |        |        |
|---------------------------|-------------------|----------|-----------|--------|--------|
| Parameter group           | Parameter         | Estimate | Est.Error | Q2.5   | Q97.5  |
| Fixed effects             | Intercept         | -0.614   | 0.099     | -0.811 | -0.424 |
| Fixed effects             | linesocial        | -0.088   | 0.138     | -0.35  | 0.179  |
| Fixed effects             | generationparents | 0.251    | 0.070     | 0.113  | 0.390  |
| Fixed effects             | speed_std         | -0.109   | 0.024     | -0.157 | -0.062 |
| Additive genetic variance | Intercept         | 0.094    | 0.038     | 0.025  | 0.174  |
| Group                     | Intercept         | 0.038    | 0.015     | 0.011  | 0.071  |
| Population                | Intercept         | 0.023    | 0.061     | 0.000  | 0.133  |
| Residual variance         | NA                | 0.355    | 0.039     | 0.280  | 0.435  |

| <b>Heritability</b>       |                   | 0.185           | 0.072            | 0.049       | 0.336        |
|---------------------------|-------------------|-----------------|------------------|-------------|--------------|
| <b>MALES</b>              |                   |                 |                  |             |              |
| <b>Parameter group</b>    | <b>Parameter</b>  | <b>Estimate</b> | <b>Est.Error</b> | <b>Q2.5</b> | <b>Q97.5</b> |
| Fixed effects             | Intercept         | 0.476           | 0.134            | 0.212       | 0.746        |
| Fixed effects             | linesocial        | -0.025          | 0.181            | -0.389      | 0.345        |
| Fixed effects             | generationparents | 0.614           | 0.088            | 0.440       | 0.785        |
| Fixed effects             | speed_std         | 0.054           | 0.046            | -0.037      | 0.145        |
| Additive genetic variance | Intercept         | 0.137           | 0.049            | 0.047       | 0.242        |
| Group                     | Intercept         | 0.075           | 0.023            | 0.036       | 0.126        |
| Population                | Intercept         | 0.046           | 0.097            | 0.000       | 0.250        |
| Residual variance         | NA                | 0.454           | 0.050            | 0.359       | 0.556        |
| <b>Heritability</b>       |                   | 0.194           | 0.069            | 0.065       | 0.337        |

**Supplementary Table 5** Results from Bayesian animal models with full pedigree relationships. We obtained heritability estimates for each sex by taking the ratio of the additive genetic variance of each sex to the total phenotypic variance (additive genetic variance + group variance + population variance + residual variance) in each independent model.

#### **ALIGNMENT**

| <b>Parameter group</b>    | <b>Parameter</b>                     | <b>Estimate</b> | <b>Est.Error</b> | <b>Q2.5</b> | <b>Q97.5</b> |
|---------------------------|--------------------------------------|-----------------|------------------|-------------|--------------|
| Fixed effects             | Intercept                            | 0.52            | 0.102            | 0.331       | 0.718        |
| Fixed effects             | sexm                                 | -0.961          | 0.063            | -1.08       | -0.838       |
| Fixed effects             | linesocial                           | 0.163           | 0.128            | -0.097      | 0.419        |
| Fixed effects             | speed_std                            | 0.36            | 0.021            | 0.319       | 0.4          |
| Fixed effects             | sexm:linesocial                      | -0.075          | 0.074            | -0.22       | 0.07         |
| Fixed effects             | sexf:generationparents               | -0.31           | 0.066            | -0.444      | -0.181       |
| Fixed effects             | sexm:generationparents               | -0.479          | 0.064            | -0.604      | -0.352       |
| Additive genetic variance | sexf                                 | 0.105           | 0.029            | 0.051       | 0.166        |
| Additive genetic variance | sexm                                 | 0.048           | 0.027            | 0.003       | 0.105        |
| Additive genetic variance | cross (sexf x sexm)                  | 0.583           | 0.270            | 0.021       | 0.974        |
| Group                     | Intercept                            | 0.025           | 0.009            | 0.009       | 0.045        |
| Population                | Intercept                            | 0.023           | 0.051            | 0.001       | 0.13         |
| Residual variance         | NA                                   | 0.365           | 0.026            | 0.314       | 0.415        |
|                           | ♀ <b>Heritability</b>                | 0.202           | 0.052            | 0.102       | 0.308        |
|                           | ♂ <b>Heritability</b>                | 0.103           | 0.057            | 0.007       | 0.224        |
|                           | $\Delta$ <b>Heritability</b> (♀ - ♂) | 0.098           | 0.053            | 0.202       | -0.005       |

#### **ATTRACTION**

| <b>Parameter group</b> | <b>Parameter</b> | <b>Estimate</b> | <b>Est.Error</b> | <b>Q2.5</b> | <b>Q97.5</b> |
|------------------------|------------------|-----------------|------------------|-------------|--------------|
|------------------------|------------------|-----------------|------------------|-------------|--------------|

|                           |                               |        |       |        |        |
|---------------------------|-------------------------------|--------|-------|--------|--------|
| Fixed effects             | Intercept                     | -0.627 | 0.115 | -0.847 | -0.391 |
| Fixed effects             | sexm                          | 1.09   | 0.075 | 0.942  | 1.23   |
| Fixed effects             | linesocial                    | -0.095 | 0.157 | -0.425 | 0.219  |
| Fixed effects             | speed_std                     | -0.067 | 0.022 | -0.109 | -0.024 |
| Fixed effects             | sexm:linesocial               | 0.072  | 0.082 | -0.091 | 0.235  |
| Fixed effects             | sexf:generationparents        | 0.283  | 0.079 | 0.129  | 0.438  |
| Fixed effects             | sexm:generationparents        | 0.568  | 0.080 | 0.411  | 0.722  |
| Additive genetic variance | sexf                          | 0.050  | 0.025 | 0.007  | 0.104  |
| Additive genetic variance | sexm                          | 0.176  | 0.041 | 0.102  | 0.263  |
| Additive genetic variance | sexm                          | 0.438  | 0.304 | -0.168 | 0.950  |
| Group                     | Intercept                     | 0.059  | 0.013 | 0.035  | 0.087  |
| Population                | Intercept                     | 0.032  | 0.056 | 0.002  | 0.172  |
| Residual variance         | NA                            | 0.406  | 0.028 | 0.351  | 0.460  |
|                           | <b>♀ Heritability</b>         | 0.092  | 0.044 | 0.013  | 0.188  |
|                           | <b>♂ Heritability</b>         | 0.261  | 0.055 | 0.157  | 0.371  |
|                           | <b>Δ Heritability (♀ - ♂)</b> | -0.169 | 0.051 | -0.267 | -0.069 |

---

**Supplementary Table 6.** Differentially expressed genes in GO term enrichment tests performed to evaluate the genomic response in midbrain, optic tectum and telencephalon in polarization-selected and control lines of female guppies when swimming with a group of conspecifics versus when swimming alone (two samples per treatment and brain region obtained by pooling brain tissue from 5 individuals each, n = 24 pools).

## MIDBRAIN

| CONTROL LINES (n=36)           |            |                    |             |               |
|--------------------------------|------------|--------------------|-------------|---------------|
| Transcript                     | Gene BLAST | Average expression | Fold Change | P-value (FDR) |
| rna32553 gene=LOC103477857     | PLCL2      | 131.212            | 27.132      | <0.001        |
| MSTRG.16482.1 gene=MSTRG.16482 | MORN4      | 37.361             | -22.976     | <0.001        |
| MSTRG.17365.1 gene=MSTRG.17365 | RPGP2      | 32.181             | -22.742     | <0.001        |
| rna23930 gene=ubap21           | ubap21     | 944.324            | -0.346      | <0.001        |
| rna14333 gene=trim33           | trim33     | 41.183             | 19.099      | <0.001        |
| rna12705 gene=LOC103466075     | MAGI2      | 1073.054           | -0.398      | <0.001        |
| rna14220 gene=LOC103466954     | FLNA       | 259.466            | 8.280       | <0.001        |
| rna43613 gene=LOC103458483     | SYNE1      | 7853.703           | 0.243       | <0.001        |
| rna46407 gene=lrfn5            | lrfn5      | 1152.716           | -0.665      | <0.001        |
| rna12704 gene=LOC103466075     | MAGI2      | 1284.870           | 0.358       | 0.001         |
| MSTRG.18176.1 gene=MSTRG.18176 | KMCP1      | 206.043            | -0.800      | 0.001         |
| rna32800 gene=u2af2            | u2af2      | 1910.842           | -0.346      | 0.001         |
| MSTRG.16838.1 gene=MSTRG.16838 | K1841      | 386.297            | 0.320       | 0.002         |
| MSTRG.4096.1 gene=MSTRG.4096   | AN13C      | 167.036            | 1.072       | 0.002         |
| rna9959 gene=kcnab2            | kcnab2     | 2321.886           | -0.139      | 0.003         |
| MSTRG.14391.4 gene=MSTRG.14391 | KMT2A      | 2251.545           | 0.175       | 0.004         |
| rna6890 gene=LOC103462605      | IGF1R      | 151.381            | 5.464       | 0.004         |
| MSTRG.16227.1 gene=MSTRG.16227 | RIBA2      | 144.642            | -0.623      | 0.004         |
| rna27802 gene=fndc3a           | fndc3a     | 639.741            | -0.517      | 0.004         |
| rna42558 gene=itpkb            | itpkb      | 253.080            | -0.714      | 0.006         |
| MSTRG.6879.2 gene=MSTRG.6879   | AEBP2      | 492.647            | -0.492      | 0.009         |
| rna15437 gene=LOC103467579     | IQEC1      | 272.493            | -0.544      | 0.010         |
| MSTRG.10425.1 gene=MSTRG.10425 | METK2      | 2522.539           | -0.149      | 0.010         |
| rna39037 gene=tanc2            | tanc2      | 352.805            | 11.879      | 0.011         |
| MSTRG.17415.2 gene=MSTRG.17415 | FLOT1      | 1005.390           | -0.284      | 0.018         |
| MSTRG.3778.3 gene=MSTRG.3778   | MAP1B      | 10822.870          | 0.090       | 0.022         |
| rna19452 gene=LOC103470078     | SCAM1      | 1692.812           | 0.214       | 0.027         |
| rna30679 gene=LOC103476732     | ANK3       | 6992.816           | 0.149       | 0.027         |
| rna42097 gene=LOC103457647     | NA         | 245.652            | -0.955      | 0.027         |
| MSTRG.7457.1 gene=MSTRG.7457   | FLNA       | 1583.394           | -0.378      | 0.033         |
| MSTRG.7577.1 gene=MSTRG.7577   | F19A5      | 1752.482           | 0.375       | 0.035         |
| rna1276 gene=acs11             | acs11      | 1052.049           | -0.289      | 0.037         |

|                            |       |          |        |       |
|----------------------------|-------|----------|--------|-------|
| rna46838 gene=LOC103460240 | FBL10 | 99.185   | -0.667 | 0.038 |
| rna18681 gene=LOC103469777 | SMAD2 | 106.022  | -0.567 | 0.042 |
| rna14493 gene=wdr6         | wdr6  | 151.669  | 0.864  | 0.048 |
| rna1738 gene=keap1         | keap1 | 2161.342 | -0.225 | 0.049 |

**POLARIZATION-SELECTED LINES (n=109)**

| <b>Transcript</b>               | <b>Gene BLAST</b> | <b>Average expression</b> | <b>Fold Change</b> | <b>P-value (FDR)</b> |
|---------------------------------|-------------------|---------------------------|--------------------|----------------------|
| rna7061 gene=LOC103462879       | PPR3E             | 144.810                   | 10.467             | < 0.001              |
| rna9051 gene=LOC103463550       | TLE4              | 90.600                    | -24.816            | < 0.001              |
| rna24376 gene=scn1b             | scn1b             | 86.552                    | 24.017             | < 0.001              |
| rna44020 gene=srrm1             | srrm1             | 13.933                    | 21.607             | < 0.001              |
| MSTRG.24305.1 gene=MSTRG.24305  | NA                | 2510.567                  | 0.748              | < 0.001              |
| rna22214 gene=egr1              | egr1              | 30.831                    | 18.839             | < 0.001              |
| rna22213 gene=egr1              | egr1              | 30.831                    | 18.839             | < 0.001              |
| rna40013 gene=LOC103482261      | CPNE3             | 115.525                   | -1.047             | < 0.001              |
| rna45945 gene=syn3              | syn3              | 2021.198                  | 0.623              | < 0.001              |
| MSTRG.17634.6 gene=MSTRG.17634  | CHIO              | 726.382                   | 0.310              | < 0.001              |
| MSTRG.11465.4 gene=MSTRG.11465  | LAMP2             | 1545.620                  | 0.231              | < 0.001              |
| MSTRG.13269.1 gene=MSTRG.13269  | FBCD1             | 2483.148                  | 0.135              | < 0.001              |
| MSTRG.24306.3 gene=MSTRG.24306  | SYN3              | 3100.717                  | 1.061              | < 0.001              |
| rna26833 gene=LOC103474460      | NCPR              | 105.368                   | 5.135              | 0.001                |
| MSTRG.3790.1 gene=MSTRG.3790    | NA                | 6932.462                  | 0.120              | 0.001                |
| rna46319 gene=rps14             | rps14             | 6939.074                  | -0.112             | 0.001                |
| MSTRG.25027.1 gene=MSTRG.25027  | NA                | 440.681                   | 0.287              | 0.001                |
| rna29486 gene=ubb               | ubb               | 1424.005                  | -0.204             | 0.001                |
| MSTRG.3031.1 gene=MSTRG.3031    | NRK2              | 907.778                   | -0.234             | 0.001                |
| rna35365 gene=LOC103479452      | UN13A             | 866.972                   | -0.478             | 0.001                |
| rna13371 gene=znf746            | znf746            | 1623.600                  | 0.312              | 0.001                |
| MSTRG.10067.35 gene=MSTRG.10067 | KCC2B             | 7708.760                  | 0.138              | 0.002                |
| MSTRG.5587.1 gene=MSTRG.5587    | NA                | 387.393                   | 0.325              | 0.002                |
| rna24078 gene=LOC103472856      | SHSA7             | 1873.094                  | 0.380              | 0.002                |
| rna4922 gene=LOC103461631       | PTPRN             | 6258.089                  | 0.342              | 0.002                |
| rna30660 gene=rgs7              | rgs7              | 2386.077                  | -0.155             | 0.002                |
| rna46774 gene=abca2             | abca2             | 985.996                   | 0.437              | 0.002                |
| rna44214 gene=stxbp6            | stxbp6            | 1369.630                  | 0.560              | 0.002                |
| MSTRG.14206.1 gene=MSTRG.14206  | SMBT1             | 81.425                    | -8.926             | 0.002                |
| rna31627 gene=LOC103477235      | BTBD3             | 5069.169                  | 0.085              | 0.003                |
| MSTRG.22324.1 gene=MSTRG.22324  | INT7              | 201.560                   | 0.525              | 0.003                |
| rna15437 gene=LOC103467579      | IQEC1             | 262.086                   | -0.619             | 0.003                |
| rna30743 gene=LOC103476767      | PTPRE             | 830.200                   | -0.300             | 0.003                |

|                                |            |          |        |       |
|--------------------------------|------------|----------|--------|-------|
| MSTRG.23588.1 gene=MSTRG.23588 | SC5A1      | 268.214  | 0.409  | 0.003 |
| rna18718 gene=sema4c           | sema4c     | 225.613  | -0.778 | 0.003 |
| rna18418 gene=LOC103469455     | ZN208      | 964.520  | 0.791  | 0.004 |
| MSTRG.24653.1 gene=MSTRG.24653 | ZN665      | 647.821  | -0.301 | 0.004 |
| rna7261 gene=prc1              | prc1       | 69.432   | -0.673 | 0.004 |
| rna33374 gene=itga8            | itga8      | 177.778  | -0.492 | 0.006 |
| rna14054 gene=LOC103466873     | CPNE9      | 1292.066 | -0.186 | 0.006 |
| rna25858 gene=add1             | add1       | 301.934  | -1.200 | 0.007 |
| rna41611 gene=abracl           | abracl     | 53.205   | 7.912  | 0.007 |
| rna8442 gene=tbc1d23           | tbc1d23    | 532.141  | 0.310  | 0.009 |
| MSTRG.15056.1 gene=MSTRG.15056 | ST32A      | 275.300  | 0.492  | 0.009 |
| rna2302 gene=LOC103472525      | NEUL1      | 298.298  | -0.452 | 0.009 |
| MSTRG.10567.1 gene=MSTRG.10567 | EDIL3      | 901.674  | 0.304  | 0.009 |
| rna20215 gene=klf9             | klf9       | 230.772  | 0.515  | 0.009 |
| MSTRG.24002.1 gene=MSTRG.24002 | KCNA1      | 5020.815 | 0.142  | 0.009 |
| rna43122 gene=npas3            | npas3      | 579.387  | 0.533  | 0.010 |
| MSTRG.11745.1 gene=MSTRG.11745 | P33MX      | 3488.184 | 0.108  | 0.010 |
| rna28848 gene=gng8             | gng8       | 189.567  | -0.795 | 0.011 |
| MSTRG.14250.1 gene=MSTRG.14250 | TMTC3      | 9253.455 | 0.190  | 0.011 |
| rna32670 gene=LOC103477783     | PNRC2      | 6535.494 | 0.077  | 0.011 |
| rna37128 gene=LOC103480432     | COR1B      | 96.683   | -7.060 | 0.011 |
| rna836 gene=LOC103465321       | PLAK       | 165.686  | -2.434 | 0.012 |
| MSTRG.22229.1 gene=MSTRG.22229 | NA         | 989.886  | 0.301  | 0.012 |
| rna14269 gene=LOC103466973     | MYT1       | 150.362  | -8.518 | 0.012 |
| rna26517 gene=LOC103474357     | NA         | 680.176  | 0.312  | 0.013 |
| rna14680 gene=tardbp           | tardbp     | 786.594  | -0.256 | 0.015 |
| rna18417 gene=LOC103469455     | ZN208      | 987.995  | -0.992 | 0.016 |
| rna12053 gene=rpl27a           | rpl27a     | 5598.155 | -0.121 | 0.016 |
| rna3113 gene=fam171b           | fam171b    | 676.632  | -0.622 | 0.017 |
| rna10216 gene=LOC103464678     | S12A5      | 465.767  | -0.326 | 0.017 |
| MSTRG.24178.2 gene=MSTRG.24178 | AEBP2      | 406.228  | -0.382 | 0.018 |
| rna41338 gene=clg20hxf23       | clg20hxf23 | 38.754   | -5.680 | 0.018 |
| rna25124 gene=rpl37            | rpl37      | 3795.051 | -0.136 | 0.018 |
| rna21184 gene=dusp1            | dusp1      | 601.109  | 0.245  | 0.019 |
| rna22048 gene=LOC103471326     | NA         | 5028.797 | 0.222  | 0.021 |
| MSTRG.7705.1 gene=MSTRG.7705   | TADBP      | 659.341  | 0.309  | 0.021 |
| rna15823 gene=LOC103467371     | LFG2       | 6610.378 | 0.128  | 0.021 |
| rna42117 gene=foxo3            | foxo3      | 4839.429 | 0.112  | 0.021 |
| rna15369 gene=baz2a            | baz2a      | 2468.169 | 0.271  | 0.023 |
| rna16768 gene=wbp11            | wbp11      | 637.220  | 0.247  | 0.023 |
| rna36928 gene=dgkk             | dgkk       | 330.445  | -0.856 | 0.024 |

|                                |         |           |        |       |
|--------------------------------|---------|-----------|--------|-------|
| rna8044 gene=uchl5             | uchl5   | 1901.123  | -0.123 | 0.025 |
| rna12667 gene=erc1             | erc1    | 1227.615  | 0.223  | 0.026 |
| MSTRG.20354.5 gene=MSTRG.20354 | DLG5    | 269.626   | 0.856  | 0.029 |
| rna2024 gene=LOC103470494      | GRIA2   | 2812.527  | 0.166  | 0.030 |
| rna10139 gene=pdhb             | pdhb    | 2640.130  | -0.139 | 0.030 |
| MSTRG.8108.1 gene=MSTRG.8108   | 143BA   | 11583.530 | 0.122  | 0.030 |
| MSTRG.11772.3 gene=MSTRG.11772 | RNF6    | 375.432   | 0.328  | 0.030 |
| rna35260 gene=wdr47            | wdr47   | 2309.695  | -0.136 | 0.030 |
| MSTRG.1635.3 gene=MSTRG.1635   | NLGX    | 1082.247  | 0.316  | 0.030 |
| MSTRG.6043.23 gene=MSTRG.6043  | NFASC   | 4875.050  | 0.157  | 0.031 |
| rna19015 gene=LOC103469839     | SNF5    | 558.868   | -0.187 | 0.031 |
| rna30678 gene=LOC103476732     | ANK3    | 748.739   | 0.483  | 0.031 |
| rna26037 gene=LOC103473957     | STXB1   | 55589.294 | 0.068  | 0.031 |
| rna27530 gene=LOC103474859     | H33     | 10943.188 | -0.110 | 0.034 |
| rna8930 gene=LOC103463612      | RORB    | 1423.800  | 0.184  | 0.034 |
| rna31916 gene=rps27a           | rps27a  | 10460.725 | -0.096 | 0.035 |
| rna41322 gene=eif2s3           | eif2s3  | 2821.758  | -0.139 | 0.035 |
| rna29177 gene=LOC103475891     | AIFM1   | 41.012    | 5.526  | 0.035 |
| MSTRG.25212.1 gene=MSTRG.25212 | PLXA3   | 597.785   | 0.488  | 0.037 |
| MSTRG.10784.1 gene=MSTRG.10784 | RYR1    | 25.899    | 1.375  | 0.039 |
| rna6858 gene=LOC103462628      | CHST8   | 1822.516  | 0.123  | 0.039 |
| rna19888 gene=LOC103470302     | NA      | 327.381   | -0.746 | 0.040 |
| MSTRG.11901.1 gene=MSTRG.11901 | NA      | 1157.565  | 0.231  | 0.044 |
| rna28113 gene=actn4            | actn4   | 1503.002  | -0.194 | 0.044 |
| MSTRG.24804.1 gene=MSTRG.24804 | ABCA2   | 1009.735  | -0.353 | 0.045 |
| MSTRG.15875.1 gene=MSTRG.15875 | ARHGC   | 511.656   | 0.253  | 0.045 |
| rna1297 gene=fbxo41            | fbxo41  | 2701.441  | 0.134  | 0.046 |
| rna11314 gene=LOC103465330     | AGAP2   | 872.129   | 0.343  | 0.047 |
| rna25393 gene=cdc3711          | cdc3711 | 253.320   | -0.270 | 0.047 |
| rna43115 gene=akap6            | akap6   | 659.763   | 4.534  | 0.047 |
| MSTRG.9250.1 gene=MSTRG.9250   | MFS6L   | 901.045   | 0.193  | 0.048 |
| rna22955 gene=gatad2b          | gatad2b | 5809.079  | 0.156  | 0.048 |
| MSTRG.1327.2 gene=MSTRG.1327   | G137C   | 1064.576  | 0.197  | 0.048 |
| MSTRG.17605.2 gene=MSTRG.17605 | CEP72   | 4481.235  | 0.158  | 0.048 |
| MSTRG.9514.1 gene=MSTRG.9514   | KPCA    | 2230.300  | 0.158  | 0.049 |

## OPTIC TECTUM

### CONTROL LINES (n=187)

| Transcript                 | Gene BLAST | Average expression | Fold Change | P-value (FDR) |
|----------------------------|------------|--------------------|-------------|---------------|
| rna31156 gene=LOC103476975 | ERLN1      | 44.054             | -23.947     | < 0.001       |
| rna45754 gene=kcnc2        | kcnc2      | 862.523            | 0.336       | < 0.001       |



|                                 |          |           |         |         |
|---------------------------------|----------|-----------|---------|---------|
| MSTRG.3467.33 gene=MSTRG.3467   | MADD     | 535.023   | -0.426  | < 0.001 |
| MSTRG.15801.1 gene=MSTRG.15801  | FEZ1     | 709.036   | 0.450   | < 0.001 |
| rna47175 gene=fsd11             | fsd11    | 57.585    | -6.841  | < 0.001 |
| rna8739 gene=LOC103463733       | PAIRB    | 184.831   | -8.877  | 0.001   |
| rna11571 gene=nfasc             | nfasc    | 204.340   | -10.374 | 0.001   |
| rna21659 gene=gsr               | gsr      | 152.518   | -0.791  | 0.001   |
| MSTRG.14289.2 gene=MSTRG.14289  | CLPB     | 860.114   | -0.369  | 0.004   |
| MSTRG.18014.5 gene=MSTRG.18014  | SAC1A    | 583.077   | -0.301  | 0.004   |
| rna38083 gene=eme2              | eme2     | 298.137   | -0.519  | 0.004   |
| MSTRG.5196.2 gene=MSTRG.5196    | HEMK1    | 387.510   | -1.001  | 0.004   |
| rna28725 gene=proser1           | proser1  | 414.492   | -0.419  | 0.004   |
| MSTRG.15730.1 gene=MSTRG.15730  | MAP6     | 1424.326  | -0.361  | 0.004   |
| rna28934 gene=LOC103475715      | NPAS2    | 236.645   | -1.310  | 0.004   |
| MSTRG.917.1 gene=MSTRG.917      | MYG      | 2925.534  | 0.261   | 0.004   |
| MSTRG.9656.1 gene=MSTRG.9656    | MFS11    | 246.930   | -0.343  | 0.005   |
| rna12640 gene=sephs1            | sephs1   | 61.114    | -8.344  | 0.005   |
| rna9975 gene=timp4              | timp4    | 4018.568  | 0.133   | 0.005   |
| rna21336 gene=sparc             | sparc    | 2184.843  | 0.289   | 0.005   |
| rna18695 gene=LOC103469766      | XNIF     | 6926.725  | -0.137  | 0.005   |
| MSTRG.13682.4 gene=MSTRG.13682  | DYN1     | 902.700   | -0.436  | 0.005   |
| rna39368 gene=LOC103481895      | PHIPL    | 1250.523  | 0.275   | 0.006   |
| MSTRG.24446.1 gene=MSTRG.24446  | NA       | 129.841   | -0.756  | 0.006   |
| rna20093 gene=LOC103470431      | rsmG     | 56982.959 | 0.171   | 0.006   |
| MSTRG.10409.5 gene=MSTRG.10409  | HIP1R    | 229.374   | -1.111  | 0.007   |
| MSTRG.24774.24 gene=MSTRG.24774 | E41L3    | 222.455   | -0.670  | 0.008   |
| rna17061 gene=cacna1i           | cacna1i  | 967.348   | -0.420  | 0.009   |
| rna19619 gene=pde4d             | pde4d    | 389.720   | -0.416  | 0.009   |
| rna23861 gene=clk2              | clk2     | 1467.038  | -0.164  | 0.009   |
| rna20745 gene=LOC103470831      | S12A2    | 1144.392  | 0.736   | 0.009   |
| MSTRG.22864.5 gene=MSTRG.22864  | MABP1    | 646.420   | -0.385  | 0.009   |
| rna39712 gene=cacna1g           | cacna1g  | 915.637   | -0.347  | 0.010   |
| MSTRG.10346.1 gene=MSTRG.10346  | PERF     | 664.481   | 0.237   | 0.010   |
| MSTRG.24190.1 gene=MSTRG.24190  | NYNRI    | 734.469   | -0.722  | 0.010   |
| MSTRG.13834.2 gene=MSTRG.13834  | NMDZ1    | 4878.659  | -0.246  | 0.010   |
| rna46689 gene=LOC103460147      | E41L3    | 326.656   | -0.451  | 0.010   |
| rna1478 gene=suclg1             | suclg1   | 310.395   | 0.424   | 0.010   |
| rna18243 gene=LOC103469344      | RHG23    | 663.109   | 0.551   | 0.010   |
| MSTRG.16227.1 gene=MSTRG.16227  | RIBA2    | 133.475   | -0.668  | 0.010   |
| rna11521 gene=LOC103465433      | NA       | 3055.567  | -0.322  | 0.010   |
| rna32056 gene=kiaa0319          | kiaa0319 | 425.023   | -0.831  | 0.011   |
| rna33697 gene=LOC103478428      | FEZ2     | 157.395   | -0.446  | 0.011   |

|                                 |          |           |        |       |
|---------------------------------|----------|-----------|--------|-------|
| rna39112 gene=LOC103481688      | ANK3     | 1151.108  | -0.739 | 0.011 |
| MSTRG.7552.1 gene=MSTRG.7552    | GBRD     | 924.733   | -0.409 | 0.011 |
| rna6818 gene=chd9               | chd9     | 506.594   | 1.474  | 0.012 |
| MSTRG.6879.2 gene=MSTRG.6879    | AEBP2    | 755.567   | -0.594 | 0.013 |
| rna8820 gene=bsg                | bsg      | 5022.883  | 0.117  | 0.013 |
| rna32896 gene=rbp5              | rbp5     | 700.965   | 0.314  | 0.013 |
| rna9941 gene=LOC103464464       | NA       | 6700.276  | 0.142  | 0.013 |
| rna4264 gene=s100b              | s100b    | 44245.997 | 0.203  | 0.013 |
| rna10292 gene=LOC103464714      | SYT2     | 951.110   | -0.683 | 0.013 |
| rna32087 gene=LOC103477466      | PI4KB    | 1081.824  | -0.409 | 0.013 |
| rna24933 gene=LOC103473353      | SMCA2    | 1265.118  | -0.322 | 0.013 |
| rna8437 gene=gtpbp6             | gtpbp6   | 407.444   | -0.307 | 0.013 |
| MSTRG.20719.13 gene=MSTRG.20719 | SHSA6    | 1502.578  | -0.408 | 0.013 |
| rna43889 gene=LOC103458562      | CO052    | 769.649   | -0.511 | 0.013 |
| rna31795 gene=rims1             | rims1    | 871.867   | -0.267 | 0.013 |
| rna39949 gene=arhgef4           | arhgef4  | 391.940   | -0.310 | 0.013 |
| MSTRG.14169.1 gene=MSTRG.14169  | APBP2    | 489.681   | -0.306 | 0.013 |
| MSTRG.17087.27 gene=MSTRG.17087 | SYGP1    | 2095.222  | -0.290 | 0.013 |
| MSTRG.18474.3 gene=MSTRG.18474  | GDE      | 1577.365  | -0.197 | 0.014 |
| rna24455 gene=ago4              | ago4     | 805.347   | 0.399  | 0.014 |
| MSTRG.15686.3 gene=MSTRG.15686  | SRRM3    | 873.289   | -0.377 | 0.014 |
| rna24998 gene=fnbp1             | fnbp1    | 733.773   | -0.604 | 0.015 |
| rna27624 gene=serpine2          | serpine2 | 3522.939  | 0.124  | 0.015 |
| rna35717 gene=LOC103479568      | PSA7     | 1970.107  | 0.113  | 0.015 |
| rna5025 gene=LOC103460921       | PDXK     | 3641.298  | 0.200  | 0.016 |
| MSTRG.24191.1 gene=MSTRG.24191  | EFC1     | 758.821   | -0.790 | 0.016 |
| MSTRG.19248.1 gene=MSTRG.19248  | NALP1    | 250.455   | -0.743 | 0.016 |
| rna14471 gene=LOC103467107      | VWA1     | 291.946   | 0.459  | 0.016 |
| rna27096 gene=sik2              | sik2     | 1497.974  | -0.340 | 0.016 |
| rna4809 gene=dapl1              | dapl1    | 529.088   | 0.361  | 0.016 |
| rna20030 gene=LOC103470390      | LCAP     | 1033.226  | 0.321  | 0.017 |
| rna385 gene=LOC103474313        | HEBP2    | 6881.290  | 0.112  | 0.018 |
| rna14585 gene=LOC103467181      | GSTM1    | 383.607   | 0.332  | 0.018 |
| MSTRG.1958.1 gene=MSTRG.1958    | LRRF2    | 1052.046  | -0.222 | 0.021 |
| rna16860 gene=pick1             | pick1    | 224.937   | -0.839 | 0.021 |
| MSTRG.9169.3 gene=MSTRG.9169    | TTYH3    | 243.157   | 0.339  | 0.021 |
| MSTRG.3724.24 gene=MSTRG.3724   | SHAN2    | 960.854   | -0.308 | 0.022 |
| rna29486 gene=ubb               | ubb      | 1938.270  | 0.196  | 0.023 |
| rna35679 gene=LOC103479583      | DPP6     | 226.201   | -0.421 | 0.024 |
| rna1353 gene=pgm2               | pgm2     | 298.878   | 1.051  | 0.024 |
| rna4718 gene=ndufs1             | ndufs1   | 704.549   | 0.317  | 0.024 |

|                                 |        |           |         |       |
|---------------------------------|--------|-----------|---------|-------|
| rna25185 gene=LOC103473483      | SCRB2  | 1298.625  | 0.227   | 0.024 |
| MSTRG.11218.1 gene=MSTRG.11218  | CC142  | 510.828   | -0.225  | 0.024 |
| rna6428 gene=LOC103462451       | TRI66  | 691.559   | 0.489   | 0.024 |
| rna39783 gene=atad1             | atad1  | 224.854   | -0.367  | 0.024 |
| rna39263 gene=LOC103481783      | ZN235  | 294.711   | -0.637  | 0.025 |
| rna31608 gene=LOC103477221      | CYT    | 2957.013  | 0.211   | 0.027 |
| rna8962 gene=LOC103463594       | ZFYV9  | 2108.108  | -0.195  | 0.027 |
| rna30529 gene=LOC103476656      | GDS1   | 1925.695  | 0.332   | 0.027 |
| MSTRG.4676.4 gene=MSTRG.4676    | DOT1L  | 1214.736  | -0.288  | 0.027 |
| rna25497 gene=LOC103473681      | NA     | 2400.413  | 0.321   | 0.027 |
| rna33379 gene=LOC103478617      | HEY1   | 707.379   | 0.232   | 0.028 |
| rna42980 gene=gja1              | gja1   | 24024.747 | 0.156   | 0.029 |
| rna1352 gene=pgm2               | pgm2   | 430.082   | -0.541  | 0.029 |
| MSTRG.4713.3 gene=MSTRG.4713    | ZFYV9  | 3966.457  | -0.290  | 0.029 |
| rna5711 gene=mrpl46             | mrpl46 | 342.311   | 0.276   | 0.029 |
| MSTRG.6387.2 gene=MSTRG.6387    | AASS   | 519.728   | -0.348  | 0.029 |
| rna9652 gene=ccdc51             | ccdc51 | 89.289    | 0.739   | 0.029 |
| MSTRG.4313.1 gene=MSTRG.4313    | LORF2  | 40.998    | 1.225   | 0.029 |
| MSTRG.14276.7 gene=MSTRG.14276  | HIP1   | 502.571   | -0.272  | 0.029 |
| MSTRG.6781.1 gene=MSTRG.6781    | NA     | 176.637   | -0.375  | 0.029 |
| rna34295 gene=aldh2             | aldh2  | 948.974   | 0.186   | 0.029 |
| MSTRG.8952.3 gene=MSTRG.8952    | CAC1I  | 2257.156  | -0.189  | 0.030 |
| rna16138 gene=LOC103468055      | L1CAM  | 2054.282  | -0.230  | 0.030 |
| rna17402 gene=rhbdfl            | rhbdfl | 461.449   | -0.505  | 0.030 |
| rna45 gene=fbx118               | fbx118 | 1526.888  | -0.201  | 0.030 |
| MSTRG.21801.2 gene=MSTRG.21801  | NA     | 161.643   | -11.290 | 0.030 |
| MSTRG.11045.2 gene=MSTRG.11045  | STAG2  | 696.471   | -0.327  | 0.030 |
| MSTRG.18008.6 gene=MSTRG.18008  | RBM42  | 981.920   | -0.292  | 0.030 |
| MSTRG.5146.19 gene=MSTRG.5146   | CAPS1  | 2211.292  | -0.368  | 0.031 |
| rna554 gene=LOC103464924        | NA     | 1135.002  | 0.275   | 0.031 |
| MSTRG.22927.5 gene=MSTRG.22927  | PANK2  | 199.419   | -0.358  | 0.031 |
| MSTRG.4337.1 gene=MSTRG.4337    | NA     | 163.807   | -0.398  | 0.031 |
| MSTRG.6421.1 gene=MSTRG.6421    | DNM1L  | 284.253   | -0.331  | 0.032 |
| MSTRG.20883.51 gene=MSTRG.20883 | CAC1G  | 2176.919  | -0.280  | 0.032 |
| rna17397 gene=hbz               | hbz    | 2654.700  | 0.777   | 0.032 |
| rna9952 gene=pax7               | pax7   | 2715.333  | 0.252   | 0.033 |
| MSTRG.12285.7 gene=MSTRG.12285  | CSPG5  | 498.929   | -0.448  | 0.033 |
| MSTRG.4508.3 gene=MSTRG.4508    | ANR29  | 148.773   | -0.558  | 0.034 |
| rna15287 gene=LOC103467653      | MYPT2  | 161.547   | -0.529  | 0.034 |
| MSTRG.21917.2 gene=MSTRG.21917  | AIG1   | 812.919   | -0.226  | 0.034 |
| rna31978 gene=cul9              | cul9   | 815.724   | -0.454  | 0.034 |

|                                  |         |          |        |       |
|----------------------------------|---------|----------|--------|-------|
| MSTRG.5079.1 gene=MSTRG.5079     | CCD66   | 158.970  | -0.655 | 0.034 |
| rna33477 gene=hdac9              | hdac9   | 1208.808 | -0.204 | 0.034 |
| rna32208 gene=LOC103477566       | NA      | 136.825  | -8.874 | 0.034 |
| MSTRG.23173.1 gene=MSTRG.23173   | M3K9    | 393.992  | -0.443 | 0.034 |
| rna44660 gene=rca3               | rca3    | 1297.437 | 0.176  | 0.034 |
| MSTRG.22663.6 gene=MSTRG.22663   | CNIH3   | 1399.089 | -0.365 | 0.035 |
| rna2408 gene=LOC103472140        | STRN    | 534.708  | -0.374 | 0.035 |
| MSTRG.12275.1 gene=MSTRG.12275   | NA      | 289.805  | -0.465 | 0.035 |
| MSTRG.11276.1 gene=MSTRG.11276   | NA      | 808.305  | 0.259  | 0.035 |
| MSTRG.6086.4 gene=MSTRG.6086     | SETD5   | 646.909  | -0.482 | 0.035 |
| rna20492 gene=ncs1               | ncs1    | 1548.351 | 0.135  | 0.035 |
| rna44860 gene=mtpn               | mtpn    | 3939.993 | 0.096  | 0.035 |
| rna9563 gene=LOC103464301        | SC6A6   | 3463.148 | 0.093  | 0.035 |
| MSTRG.20597.113 gene=MSTRG.20597 | ANK3    | 3978.012 | -0.257 | 0.035 |
| rna15537 gene=LOC103467937       | ST1S3   | 92.866   | 0.506  | 0.035 |
| MSTRG.2919.2 gene=MSTRG.2919     | KPBB    | 1982.178 | -0.275 | 0.035 |
| MSTRG.8196.8 gene=MSTRG.8196     | CDK17   | 523.422  | -0.384 | 0.035 |
| MSTRG.10756.1 gene=MSTRG.10756   | CACP    | 73.826   | 1.141  | 0.036 |
| MSTRG.21665.4 gene=MSTRG.21665   | ASAP1   | 2262.217 | -0.338 | 0.036 |
| rna9074 gene=LOC103463535        | SAFB2   | 486.492  | 0.877  | 0.036 |
| MSTRG.6893.1 gene=MSTRG.6893     | KCND2   | 751.620  | -0.249 | 0.037 |
| rna37092 gene=gabarap            | gabarap | 9554.826 | 0.122  | 0.037 |
| MSTRG.21609.4 gene=MSTRG.21609   | MYPT1   | 538.478  | -1.474 | 0.037 |
| MSTRG.17335.7 gene=MSTRG.17335   | KPCA    | 1293.373 | -0.233 | 0.037 |
| MSTRG.14062.6 gene=MSTRG.14062   | NCAM1   | 671.251  | -0.400 | 0.038 |
| rna48393 gene=LOC103461400       | PPAL    | 460.373  | 0.240  | 0.039 |
| rna43205 gene=ckb                | ckb     | 568.475  | 0.225  | 0.039 |
| rna46432 gene=ddx46              | ddx46   | 2735.921 | -0.244 | 0.039 |
| rna10428 gene=LOC103464779       | HES5    | 738.767  | 0.267  | 0.039 |
| rna13605 gene=LOC103466450       | RFX7    | 1889.887 | 0.384  | 0.039 |
| rna1698 gene=LOC103468483        | ELOF1   | 256.797  | 0.280  | 0.039 |
| rna37063 gene=bcl6b              | bcl6b   | 201.983  | 0.501  | 0.039 |
| rna36246 gene=smg7               | smg7    | 2826.022 | -0.149 | 0.039 |
| MSTRG.8764.2 gene=MSTRG.8764     | DDX5    | 9210.083 | -0.235 | 0.039 |
| rna20266 gene=LOC103470511       | DNM1L   | 1990.942 | -0.169 | 0.039 |
| MSTRG.8986.28 gene=MSTRG.8986    | CAC1A   | 5587.949 | -0.207 | 0.039 |
| MSTRG.12290.2 gene=MSTRG.12290   | CTNB1   | 2910.930 | -0.206 | 0.039 |
| rna564 gene=gde1                 | gde1    | 785.583  | 0.260  | 0.041 |
| MSTRG.16875.3 gene=MSTRG.16875   | S22AF   | 106.886  | -0.823 | 0.041 |
| MSTRG.11867.7 gene=MSTRG.11867   | GRIA2   | 7579.132 | -0.254 | 0.041 |
| rna28723 gene=thsd1              | thsd1   | 124.740  | -0.707 | 0.042 |

|                                |        |           |         |       |
|--------------------------------|--------|-----------|---------|-------|
| rna32852 gene=casp2            | casp2  | 194.575   | 0.487   | 0.042 |
| MSTRG.19932.2 gene=MSTRG.19932 | ERF3A  | 147.054   | -0.532  | 0.042 |
| MSTRG.14143.1 gene=MSTRG.14143 | WSB1   | 2604.092  | -0.329  | 0.043 |
| MSTRG.1695.1 gene=MSTRG.1695   | WBP4   | 118.747   | -0.790  | 0.043 |
| rna12783 gene=cib1             | cib1   | 172.780   | 0.314   | 0.045 |
| rna39046 gene=LOC103481669     | RHG27  | 219.443   | 0.377   | 0.045 |
| rna4111 gene=etv5              | etv5   | 177.296   | 0.799   | 0.045 |
| rna45179 gene=LOC103459268     | CAC1C  | 1903.168  | -0.854  | 0.046 |
| rna43863 gene=zbtb42           | zbtb42 | 95.269    | -10.618 | 0.047 |
| rna43182 gene=tyro3            | tyro3  | 1426.998  | 0.392   | 0.047 |
| rna26654 gene=snx19            | snx19  | 2368.539  | -0.171  | 0.047 |
| rna16854 gene=LOC103468448     | BORG5  | 259.020   | 0.308   | 0.048 |
| MSTRG.8096.18 gene=MSTRG.8096  | WNK2   | 3178.569  | -0.321  | 0.049 |
| MSTRG.17167.1 gene=MSTRG.17167 | ARL4A  | 107.263   | -9.441  | 0.049 |
| MSTRG.10976.1 gene=MSTRG.10976 | NA     | 339.637   | -0.260  | 0.049 |
| rna18354 gene=LOC103469494     | EIF1   | 480.176   | -0.425  | 0.049 |
| rna12804 gene=slc1a2           | slc1a2 | 38882.612 | 0.102   | 0.049 |
| MSTRG.5171.1 gene=MSTRG.5171   | RBM5   | 1463.233  | -0.303  | 0.049 |
| MSTRG.18686.1 gene=MSTRG.18686 | RHG12  | 753.715   | -0.292  | 0.049 |
| MSTRG.24504.1 gene=MSTRG.24504 | RAE1   | 743.520   | -0.294  | 0.049 |
| MSTRG.3297.5 gene=MSTRG.3297   | DGLA   | 461.380   | -0.328  | 0.049 |

### POLARIZATION-SELECTED LINES (n=21)

| Transcript                     | Gene BLAST | Average expression | Fold Change | P-value (FDR) |
|--------------------------------|------------|--------------------|-------------|---------------|
| MSTRG.21801.2 gene=MSTRG.21801 | NA         | 102.640            | 24.315      | < 0.001       |
| rna20241 gene=entpd4           | entpd4     | 13.232             | 21.501      | < 0.001       |
| rna5604 gene=cdh8              | cdh8       | 1553.154           | 0.643       | < 0.001       |
| rna24376 gene=scn1b            | scn1b      | 92.098             | 19.494      | < 0.001       |
| rna22214 gene=egr1             | egr1       | 39.104             | 18.875      | < 0.001       |
| rna22213 gene=egr1             | egr1       | 39.104             | 18.875      | < 0.001       |
| MSTRG.2915.2 gene=MSTRG.2915   | CADH8      | 292.560            | -7.961      | < 0.001       |
| rna15769 gene=LOC103467406     | DSLE       | 156.024            | -0.735      | 0.002         |
| MSTRG.22698.1 gene=MSTRG.22698 | LAMA4      | 269.181            | -8.539      | 0.004         |
| rna29823 gene=wwc1             | wwc1       | 283.825            | -9.054      | 0.008         |
| rna1269 gene=gucy1a3           | gucy1a3    | 206.417            | -0.773      | 0.010         |
| rna28422 gene=LOC103475388     | CTR3       | 1020.217           | 0.605       | 0.015         |
| rna35022 gene=LOC103479254     | KC1G2      | 174.252            | -1.351      | 0.020         |
| rna16375 gene=LOC103468166     | MPP2       | 287.359            | 0.758       | 0.020         |
| rna29120 gene=LOC103475822     | SPTB2      | 245.255            | -8.404      | 0.032         |
| rna12010 gene=slc6a15          | slc6a15    | 4110.120           | 0.134       | 0.034         |

|                            |        |         |        |       |
|----------------------------|--------|---------|--------|-------|
| rna23231 gene=ahdc1        | ahdc1  | 875.602 | -0.421 | 0.034 |
| rna35400 gene=LOC103479433 | P66B   | 129.015 | -0.435 | 0.034 |
| rna39880 gene=tmem94       | tmem94 | 138.800 | 8.215  | 0.040 |
| rna7779 gene=LOC103463266  | RAB3C  | 271.999 | -0.557 | 0.040 |
| rna41072 gene=LOC103456849 | ESCO1  | 357.308 | 11.958 | 0.040 |

### TELENCEPHALON

#### CONTROL LINES (n=29)

| Transcript                     | Gene<br>BLAST | Average<br>expression | Fold<br>Change | P-value<br>(FDR) |
|--------------------------------|---------------|-----------------------|----------------|------------------|
| rna16008 gene=zmynd12          | zmynd12       | 131.990               | 3< 0.001       | < 0.001          |
| rna45464 gene=slc37a3          | slc37a3       | 38.721                | -22.872        | < 0.001          |
| rna14004 gene=LOC103466852     | CNGB1         | 40.820                | 22.427         | < 0.001          |
| rna36260 gene=LOC103480019     | PTPR2         | 26.631                | -22.537        | < 0.001          |
| MSTRG.16482.1 gene=MSTRG.16482 | MORN4         | 15.553                | -22.396        | < 0.001          |
| rna9271 gene=ncln              | ncln          | 35.830                | 8.337          | < 0.001          |
| rna1296 gene=fbxo41            | fbxo41        | 364.240               | -0.593         | < 0.001          |
| rna10792 gene=plxna1           | plxna1        | 299.891               | 1.086          | 0.001            |
| rna34474 gene=LOC103478864     | HHATL         | 249.894               | 0.719          | 0.003            |
| MSTRG.16496.1 gene=MSTRG.16496 | LDB1          | 437.207               | -0.439         | 0.006            |
| rna8510 gene=cc2d2a            | cc2d2a        | 231.497               | -0.488         | 0.007            |
| rna45291 gene=grip1            | grip1         | 1272.284              | 0.304          | 0.009            |
| rna564 gene=gde1               | gde1          | 945.463               | 0.225          | 0.009            |
| rna752 gene=tsc2               | tsc2          | 572.522               | -0.466         | 0.014            |
| rna33839 gene=LOC103478362     | COBL          | 316.960               | 0.373          | 0.015            |
| rna38088 gene=LOC103481105     | VATL          | 241.247               | -0.797         | 0.015            |
| MSTRG.10409.5 gene=MSTRG.10409 | HIP1R         | 136.542               | -1.063         | 0.016            |
| MSTRG.20355.9 gene=MSTRG.20355 | KCMA1         | 1362.688              | -0.259         | 0.017            |
| MSTRG.21801.2 gene=MSTRG.21801 | NA            | 148.516               | -8.653         | 0.018            |
| rna13396 gene=islr2            | islr2         | 11284.671             | 0.081          | 0.020            |
| MSTRG.22908.2 gene=MSTRG.22908 | ATRNL1        | 287.114               | -0.510         | 0.020            |
| MSTRG.22993.1 gene=MSTRG.22993 | SSBP3         | 1070.362              | 0.254          | 0.020            |
| rna2770 gene=map4k4            | map4k4        | 1829.434              | 0.204          | 0.020            |
| MSTRG.205.3 gene=MSTRG.205     | IFT27         | 76.967                | 2.301          | 0.021            |
| rna45311 gene=ptprb            | ptprb         | 221.601               | -10.953        | 0.027            |
| rna28655 gene=LOC103475549     | TRIM3         | 234.203               | 0.738          | 0.027            |
| rna26416 gene=LOC103474211     | ROBO2         | 1300.445              | -0.301         | 0.044            |
| MSTRG.23960.3 gene=MSTRG.23960 | RB6I2         | 643.993               | -0.251         | 0.046            |
| rna16561 gene=LOC103468305     | FRIM          | 3458.490              | -0.117         | 0.049            |

#### POLARIZATION-SELECTED LINES (n=158)

| Transcript | Gene | Average | Fold | P-value |
|------------|------|---------|------|---------|
|------------|------|---------|------|---------|

|                                | <b>BLAST</b> | <b>expression</b> | <b>Change</b> | <b>(FDR)</b> |
|--------------------------------|--------------|-------------------|---------------|--------------|
| rna18687 gene=tial             | tial         | 401.711           | 0.422         | < 0.001      |
| MSTRG.23945.1 gene=MSTRG.23945 | CAC1C        | 1299.068          | 0.768         | < 0.001      |
| rna31577 gene=LOC103477205     | TACC2        | 2488.829          | 0.178         | < 0.001      |
| MSTRG.21916.1 gene=MSTRG.21916 | ZEP2         | 6873.343          | 0.187         | < 0.001      |
| rna9693 gene=abhd14a           | abhd14a      | 1497.664          | -0.168        | 0.001        |
| MSTRG.18769.2 gene=MSTRG.18769 | KIF1A        | 7524.576          | 0.217         | 0.001        |
| rna20419 gene=riCTOR           | riCTOR       | 558.369           | 0.353         | 0.001        |
| rna42366 gene=LOC103457350     | MAX          | 355.081           | 0.441         | 0.001        |
| MSTRG.7449.1 gene=MSTRG.7449   | AT2B3        | 4327.516          | 0.172         | 0.001        |
| MSTRG.11745.1 gene=MSTRG.11745 | P33MX        | 3551.885          | -0.160        | 0.002        |
| rna15494 gene=LOC103467551     | SLMAP        | 1057.196          | -0.220        | 0.002        |
| rna10910 gene=LOC103464892     | SORT1        | 2240.260          | 0.317         | 0.002        |
| rna46476 gene=ppm1e            | ppm1e        | 1440.302          | 0.315         | 0.003        |
| rna39999 gene=LOC103482255     | PFKAP        | 882.019           | -1.088        | 0.003        |
| rna39992 gene=LOC103482255     | PFKAP        | 1367.223          | 0.413         | 0.003        |
| rna9416 gene=LOC103464216      | LRC24        | 586.747           | 0.403         | 0.003        |
| MSTRG.9631.2 gene=MSTRG.9631   | ADA11        | 7045.660          | 0.126         | 0.003        |
| rna42290 gene=gphn             | gphn         | 1236.892          | 0.239         | 0.006        |
| rna139 gene=pcm1               | pcm1         | 415.579           | 0.513         | 0.006        |
| MSTRG.26314.1 gene=MSTRG.26314 | LIMS1        | 248.767           | -0.421        | 0.006        |
| MSTRG.9224.4 gene=MSTRG.9224   | GFAP         | 2397.131          | -0.223        | 0.008        |
| rna21649 gene=atp8a1           | atp8a1       | 223.183           | 7.673         | 0.008        |
| rna30694 gene=pgbd5            | pgbd5        | 1308.949          | 0.466         | 0.008        |
| MSTRG.14919.1 gene=MSTRG.14919 | KLC1         | 317.188           | -0.494        | 0.009        |
| rna44843 gene=magi2            | magi2        | 333.647           | -6.397        | 0.009        |
| rna4264 gene=s100b             | s100b        | 8575.720          | -0.294        | 0.011        |
| rna8601 gene=LOC103463821      | REM2         | 1266.508          | 0.215         | 0.011        |
| MSTRG.5319.1 gene=MSTRG.5319   | MTG8R        | 289.321           | 0.659         | 0.011        |
| MSTRG.8385.2 gene=MSTRG.8385   | CHDH         | 613.368           | -0.337        | 0.011        |
| rna35142 gene=LOC103479283     | PTPRS        | 3184.232          | 0.228         | 0.011        |
| MSTRG.25460.5 gene=MSTRG.25460 | DPYL2        | 1490.984          | -0.159        | 0.011        |
| rna10217 gene=LOC103464678     | S12A5        | 292.625           | 0.760         | 0.011        |
| rna3294 gene=LOC103477739      | T22D1        | 942.977           | 0.314         | 0.013        |
| MSTRG.16563.2 gene=MSTRG.16563 | KHDR2        | 596.821           | -0.263        | 0.014        |
| MSTRG.904.5 gene=MSTRG.904     | SMCA4        | 825.667           | 0.940         | 0.014        |
| rna7625 gene=LOC103463153      | KCC4         | 813.768           | 0.306         | 0.015        |
| rna23887 gene=LOC103472687     | RS27         | 8841.463          | -0.132        | 0.015        |
| rna40585 gene=atp6v1a          | atp6v1a      | 3486.538          | 0.279         | 0.015        |
| rna28612 gene=LOC103475568     | NBEA         | 1738.565          | 0.230         | 0.015        |
| rna30893 gene=eif4ebp2         | eif4ebp2     | 4206.554          | -0.129        | 0.015        |

|                                |          |          |        |       |
|--------------------------------|----------|----------|--------|-------|
| rna22733 gene=LOC103472023     | SIA4A    | 329.212  | -0.484 | 0.016 |
| rna22398 gene=gria2            | gria2    | 1501.733 | 0.394  | 0.018 |
| MSTRG.13007.1 gene=MSTRG.13007 | DEN1A    | 523.827  | -0.258 | 0.018 |
| MSTRG.604.1 gene=MSTRG.604     | PCD10    | 853.615  | -0.214 | 0.020 |
| rna20270 gene=LOC103470513     | BMP1     | 704.668  | 0.216  | 0.020 |
| MSTRG.8142.2 gene=MSTRG.8142   | GRM7     | 2211.218 | 0.219  | 0.020 |
| rna26271 gene=apbb1            | apbb1    | 616.593  | -0.529 | 0.021 |
| rna7160 gene=LOC103463007      | SHAN1    | 1246.491 | 0.303  | 0.021 |
| rna38233 gene=jph3             | jph3     | 1481.033 | 0.154  | 0.021 |
| rna9994 gene=atp2b2            | atp2b2   | 2968.692 | 0.160  | 0.021 |
| MSTRG.7852.1 gene=MSTRG.7852   | TM269    | 642.667  | -0.332 | 0.021 |
| rna41217 gene=u2surp           | u2surp   | 260.347  | 0.496  | 0.021 |
| rna16889 gene=smcr8            | smcr8    | 505.442  | 0.242  | 0.021 |
| rna20696 gene=LOC103470760     | ODO1     | 3680.969 | 0.128  | 0.022 |
| rna6714 gene=madd              | madd     | 581.771  | 0.781  | 0.024 |
| rna28842 gene=LOC103475446     | PP2BA    | 1272.204 | 0.483  | 0.025 |
| rna18171 gene=crebbp           | crebbp   | 477.352  | 0.698  | 0.025 |
| MSTRG.24874.5 gene=MSTRG.24874 | LHPL5    | 1008.636 | -0.240 | 0.025 |
| rna7423 gene=LOC103463224      | DDAH1    | 614.691  | -0.294 | 0.025 |
| rna38076 gene=LOC103481097     | MPRIP    | 1004.516 | 0.694  | 0.026 |
| rna15448 gene=bicd2            | bicd2    | 802.184  | 0.257  | 0.026 |
| rna21869 gene=mid2             | mid2     | 858.588  | -0.264 | 0.028 |
| rna1133 gene=LOC103463598      | S14L1    | 402.061  | 0.463  | 0.028 |
| rna18056 gene=tom1l2           | tom1l2   | 1234.140 | -0.201 | 0.028 |
| rna26413 gene=LOC103474211     | ROBO2    | 957.985  | 0.457  | 0.029 |
| rna3034 gene=tmem47            | tmem47   | 663.543  | -0.408 | 0.029 |
| MSTRG.26426.1 gene=MSTRG.26426 | AT2B3    | 509.885  | 0.223  | 0.029 |
| rna14675 gene=kif1b            | kif1b    | 6926.073 | 0.221  | 0.029 |
| rna28593 gene=pds5b            | pds5b    | 4058.133 | 0.116  | 0.029 |
| rna6897 gene=LOC103462737      | RGRF1    | 3742.185 | 0.223  | 0.029 |
| rna12565 gene=cacna2d1         | cacna2d1 | 307.267  | 0.642  | 0.029 |
| rna25879 gene=LOC103473860     | SHC3     | 917.756  | 0.542  | 0.030 |
| MSTRG.20400.1 gene=MSTRG.20400 | NETR     | 2933.854 | -1.107 | 0.030 |
| rna10085 gene=r3hdm2           | r3hdm2   | 882.792  | 0.293  | 0.030 |
| rna2232 gene=sh3gl2            | sh3gl2   | 1153.102 | 0.336  | 0.030 |
| rna3256 gene=LOC103477319      | NA       | 369.700  | -0.551 | 0.030 |
| rna7150 gene=cttn              | cttn     | 1432.342 | 0.154  | 0.030 |
| MSTRG.23582.7 gene=MSTRG.23582 | UNC79    | 2182.014 | -0.299 | 0.031 |
| rna28372 gene=LOC103475354     | SEP8A    | 1479.812 | 0.221  | 0.031 |
| rna40511 gene=stau2            | stau2    | 3751.772 | 0.101  | 0.031 |
| rna18955 gene=rasgef1b         | rasgef1b | 314.812  | 0.469  | 0.031 |



|                                |          |          |        |       |
|--------------------------------|----------|----------|--------|-------|
| rna40847 gene=cnksr2           | cnksr2   | 2782.045 | 0.236  | 0.031 |
| rna32682 gene=LOC103477774     | NA       | 5094.213 | -0.150 | 0.031 |
| rna11361 gene=LOC103465345     | LRP1     | 1464.591 | 0.319  | 0.031 |
| rna12226 gene=ptprz1           | ptprz1   | 939.568  | -0.197 | 0.032 |
| MSTRG.24892.1 gene=MSTRG.24892 | JUN      | 1541.880 | 0.159  | 0.032 |
| rna48421 gene=LOC103461426     | PACA     | 6547.169 | 0.114  | 0.032 |
| MSTRG.1426.7 gene=MSTRG.1426   | MCF2L    | 1541.030 | 0.216  | 0.032 |
| rna19642 gene=smarcad1         | smarcad1 | 374.477  | 0.279  | 0.033 |
| rna45583 gene=LOC103459444     | PRIC1    | 953.356  | 0.188  | 0.033 |
| rna9152 gene=ttl7              | ttl7     | 351.793  | 0.344  | 0.033 |
| rna9558 gene=rims4             | rims4    | 2057.525 | 0.123  | 0.033 |
| rna26824 gene=baz1b            | baz1b    | 250.301  | 0.419  | 0.033 |
| rna27920 gene=LOC103475082     | CUL5     | 478.350  | 0.422  | 0.034 |
| rna30614 gene=LOC103476702     | PKHA1    | 1179.339 | -0.144 | 0.034 |
| MSTRG.10701.2 gene=MSTRG.10701 | DPYL2    | 293.373  | -0.561 | 0.035 |
| rna22264 gene=LOC103471194     | SFXN1    | 1299.021 | -0.161 | 0.035 |
| rna45277 gene=cand1            | cand1    | 2417.395 | 0.115  | 0.035 |
| rna44024 gene=srrm1            | srrm1    | 719.011  | 0.472  | 0.035 |
| rna14390 gene=gnb1             | gnb1     | 2102.920 | 0.133  | 0.035 |
| rna19155 gene=camsap1          | camsap1  | 366.586  | -0.849 | 0.035 |
| rna11115 gene=LOC103465107     | BSN      | 3020.560 | 0.361  | 0.038 |
| rna13371 gene=znf746           | znf746   | 1535.108 | 0.216  | 0.038 |
| rna39374 gene=LOC103481898     | KGP1     | 3810.363 | 0.112  | 0.038 |
| rna45925 gene=LOC103459684     | CDK17    | 1635.928 | 0.146  | 0.038 |
| rna22088 gene=LOC103471305     | SSH      | 1433.568 | 0.179  | 0.038 |
| rna9540 gene=LOC103464285      | AT2B4    | 966.284  | 0.325  | 0.038 |
| rna7314 gene=LOC103462926      | GSLG1    | 2352.158 | 0.169  | 0.039 |
| rna25580 gene=dgcr2            | dgcr2    | 862.995  | 0.353  | 0.039 |
| rna19014 gene=ralgds           | ralgds   | 289.546  | 0.335  | 0.039 |
| rna46771 gene=rad17            | rad17    | 289.675  | -0.260 | 0.040 |
| rna21459 gene=LOC103471609     | ZIC3     | 848.137  | 0.211  | 0.041 |
| rna33285 gene=LOC103478674     | T200B    | 768.169  | 0.236  | 0.041 |
| rna29284 gene=klc2             | klc2     | 1027.397 | 0.157  | 0.041 |
| rna21130 gene=LOC103471057     | BRD8     | 579.688  | 0.296  | 0.041 |
| rna47838 gene=LOC103460885     | ATRN1    | 749.916  | 0.186  | 0.042 |
| rna43237 gene=jade1            | jade1    | 486.768  | 0.251  | 0.042 |
| rna39189 gene=srcap            | srcap    | 3117.647 | 0.130  | 0.043 |
| rna5118 gene=LOC103460319      | TM163    | 2283.059 | 0.153  | 0.044 |
| rna40679 gene=arfgef1          | arfgef1  | 1093.914 | 0.292  | 0.044 |
| rna36138 gene=LOC108167071     | MIB1     | 579.766  | -0.245 | 0.044 |
| rna33009 gene=gsk3a            | gsk3a    | 390.156  | 0.245  | 0.045 |

|                                |         |           |        |       |
|--------------------------------|---------|-----------|--------|-------|
| rna33558 gene=kmt2b            | kmt2b   | 1100.465  | 0.334  | 0.045 |
| rna7409 gene=LOC103463058      | LRP8    | 248.208   | 0.326  | 0.045 |
| rna36173 gene=dnajb4           | dnajb4  | 1321.044  | 0.178  | 0.045 |
| rna2990 gene=LOC103474271      | SCN2A   | 797.677   | 0.430  | 0.045 |
| rna12431 gene=LOC103465918     | S6A13   | 261.539   | -0.709 | 0.045 |
| rna39333 gene=LOC103481878     | GRID1   | 688.931   | 0.397  | 0.045 |
| MSTRG.11445.1 gene=MSTRG.11445 | TSN7    | 913.167   | -0.359 | 0.045 |
| rna4111 gene=etv5              | etv5    | 603.824   | 0.555  | 0.045 |
| rna14581 gene=LOC103467180     | AMPD2   | 4309.644  | 0.105  | 0.045 |
| rna17113 gene=sox8             | sox8    | 1165.511  | 0.165  | 0.045 |
| rna6646 gene=LOC103462596      | TLN2    | 1334.136  | 0.289  | 0.045 |
| rna1884 gene=acox1             | acox1   | 922.029   | -0.142 | 0.045 |
| MSTRG.11781.2 gene=MSTRG.11781 | ATRX    | 5501.649  | 0.144  | 0.045 |
| rna41153 gene=ptprn2           | ptprn2  | 11939.245 | 0.175  | 0.045 |
| rna4922 gene=LOC103461631      | PTPRN   | 8049.927  | 0.206  | 0.045 |
| rna2054 gene=LOC103470599      | TEN3    | 754.778   | -0.460 | 0.045 |
| rna37531 gene=LOC103480722     | PP2BA   | 3022.883  | 0.160  | 0.045 |
| MSTRG.2884.1 gene=MSTRG.2884   | CD81    | 3884.961  | -0.100 | 0.045 |
| rna10431 gene=LOC103464782     | HES5    | 297.115   | -0.279 | 0.045 |
| rna35326 gene=LOC103479394     | SCG2    | 38239.656 | 0.110  | 0.045 |
| rna19050 gene=LOC103469848     | KCC2B   | 398.238   | 0.440  | 0.046 |
| MSTRG.9859.3 gene=MSTRG.9859   | TIA1    | 386.806   | -0.289 | 0.046 |
| rna2730 gene=app               | app     | 1253.390  | 0.129  | 0.046 |
| rna43935 gene=kbtbd11          | kbtbd11 | 3946.524  | 0.180  | 0.048 |
| rna22259 gene=gabrb2           | gabrb2  | 2528.544  | 0.149  | 0.048 |
| rna28126 gene=hnrnp1           | hnrnp1  | 1361.666  | 0.189  | 0.048 |
| rna4001 gene=sumo1             | sumo1   | 1338.464  | -0.129 | 0.049 |
| rna19299 gene=slc20a2          | slc20a2 | 629.265   | -0.668 | 0.049 |
| MSTRG.10579.6 gene=MSTRG.10579 | MEF2C   | 2175.170  | -0.305 | 0.049 |
| rna32394 gene=cspg5            | cspg5   | 7576.875  | 0.148  | 0.049 |
| rna12473 gene=syt12            | syt12   | 4226.735  | 0.156  | 0.049 |
| rna11522 gene=LOC103465434     | CDK18   | 613.584   | 0.944  | 0.049 |
| MSTRG.21665.4 gene=MSTRG.21665 | ASAP1   | 1872.921  | -0.200 | 0.049 |
| MSTRG.8757.1 gene=MSTRG.8757   | UBP43   | 232.268   | -0.358 | 0.049 |
| rna43050 gene=ndufaf4          | ndufaf4 | 394.548   | -0.229 | 0.049 |
| rna28590 gene=fry              | fry     | 756.197   | 0.748  | 0.049 |

**Supplementary Table 7.** Summary of differentially co-expressed gene pair results from differential coexpression analyses to evaluate the genomic response in midbrain, optic tectum and telencephalon in polarization-selected and control lines of female guppies when swimming with a group of conspecifics versus when swimming alone (two samples per treatment and brain region obtained by pooling brain tissue from 5 individuals each, n = 24 pools).

|                                               | OPTIC TECTUM               |                                                     | TELENCEPHALON                               |                                                     |                                               | MIDBRAIN                                      |                                                                               |                               |
|-----------------------------------------------|----------------------------|-----------------------------------------------------|---------------------------------------------|-----------------------------------------------------|-----------------------------------------------|-----------------------------------------------|-------------------------------------------------------------------------------|-------------------------------|
|                                               | Control line               | Schooling line                                      | Control line                                | Schooling line                                      | Control line                                  | Schooling line                                | Control line                                                                  | Schooling line                |
| DC gene pairs                                 | 29                         | 65                                                  | 228                                         | 35                                                  | 67                                            |                                               | 60                                                                            |                               |
| DC unique genes                               | 27                         | 61                                                  | 161                                         | 36                                                  | 61                                            |                                               | 55                                                                            |                               |
| DC genes in common (between CT and SCH lines) |                            | NA                                                  |                                             | <i>ELAV2</i>                                        |                                               |                                               | <i>MKL2</i><br><i>IGF1R</i><br><i>TRIM39</i><br><i>RPL19</i><br><i>POLR1B</i> |                               |
| Genes that are DC in more than one comparison | <i>TNKB</i><br><i>GBA2</i> | <i>ELAVL2</i><br><i>MSTRG.8823</i><br><i>RANBP3</i> | <i>NTMT1</i><br><i>RL19</i><br><i>TRI39</i> | <i>LOC103468557</i><br><i>ARL4A</i><br><i>FACR1</i> | <i>GRIA2</i><br><i>GOLGA5</i><br><i>PARVA</i> | <i>KCAB1</i><br><i>IGF1R</i><br><i>PFKFB2</i> | <i>LBH</i><br><i>MKL2</i><br><i>PTGR2</i>                                     | <i>SURF2</i><br><i>POLR1B</i> |

**Supplementary Table 8.** List of differentially coexpressed genes identified by BFDCA by brain region and selection line with number of differentially correlated connections (DC gene pairs) for each gene (two samples per treatment and brain region obtained by pooling brain tissue from 5 individuals each, n = 24 pools). Genes highlighted in green are DC in more than one comparison, and those highlighted in blue are also Differentially Expressed in GO enrichment tests.

| OPTIC TECTUM  |                             | TELENCEPHALON |                             | MIDBRAIN       |                             |   |
|---------------|-----------------------------|---------------|-----------------------------|----------------|-----------------------------|---|
| Control lines | Polarization-selected lines | Control lines | Polarization-selected lines | Control lines  | Polarization-selected lines |   |
| ADPRH         | 4 TLK2                      | 7 mea1        | 13 slc17a6                  | 4 MAGI1        | 5 LOC103461370              | 6 |
| CGAS          | 4 AP1B1                     | 6 KAT7        | 7 tenm2                     | 4 csk          | 4 PLAK                      | 6 |
| ABCA1         | 3 rtn4                      | 5 ndufs4      | 7 tm2d1                     | 4 GFI1R        | 4 mmp16                     | 5 |
| CENPS         | 3 ZN226                     | 5 apmap       | 6 clmn                      | 3 PPARA        | 4 CNTNAPS                   | 4 |
| MSTRG.7285    | 3 PARVA                     | 4 arhgef4     | 6 FACR1                     | 3 CL17A        | 3 CPSF3                     | 4 |
| LOC103468557  | 3 pfkfb2                    | 4 NIPLB       | 6 KHDR2                     | 3 F264         | 3 pou4f1                    | 4 |
| NRIP3         | 3 SHC3                      | 4 pkn1        | 6 LRC24                     | 3 hmga2        | 3 abracl                    | 3 |
| pcdh19        | 3 tom1l2                    | 4 rpl17       | 6 PTPRS                     | 3 LOC103468544 | 3 CCDC127                   | 3 |
| STIMA         | 3 ASIC1                     | 3 TRIM69      | 6 SUIS_HUMAN                | 2 LOC103468557 | 3 DNAI2                     | 3 |
| SURF2         | 3 CCDC51                    | 3 ARIP4       | 5 grm1                      | 2 MILK1        | 3 HES6                      | 3 |
| BC11B         | 2 CDH6                      | 3 cndp2       | 5 LBH                       | 2 polr1b       | 3 LOC103461363              | 3 |
| DLGAP2        | 2 ERLN1                     | 3 ldhb        | 5 MACF1                     | 2 RASSF5       | 3 NUP205                    | 3 |
| ENAH          | 2 GRID2                     | 3 LRRT4       | 5 MSTRG.5809                | 2 rbm33        | 3 otp                       | 3 |
| GBA2          | 2 KCC2B                     | 3 rps8        | 5 mthfs                     | 2 rbm45        | 3 pdgfrb                    | 3 |
| KCNH7         | 2 KLHL17                    | 3 smarca4     | 5 nrp2                      | 2 S4A7         | 3 ABRAL                     | 2 |
| mapk6         | 2 mphosph8                  | 3 tbc1d13     | 5 PNN                       | 2 ABCD1        | 2 ARL1B                     | 2 |
| rbms1         | 2 ntmt1                     | 3 AT8B2       | 4 RAB3A                     | 2 dctn1        | 2 ARL4A                     | 2 |
| slc29a2       | 2 r3hdm2                    | 3 CYTB        | 4 rheb                      | 2 dnal1        | 2 ARL6                      | 2 |
| tmbim6        | 2 TSPAN8                    | 3 dvl1        | 4 rpl7                      | 2 DNP1         | 2 CALB2                     | 2 |
| ADHX          | 1 cdk14                     | 2 gatad2b     | 4 RXRBA                     | 2 DOCK9        | 2 clg20hxf23                | 2 |
| ARL4A         | 1 CROL2                     | 2 htr7        | 4 TLK1B                     | 2 eaf1         | 2 CORO2A                    | 2 |
| clns1a        | 1 EAF1                      | 2 ier2        | 4 TM205                     | 2 GRIA2        | 2 ctps1                     | 2 |
| SCD5          | 1 FOXP2                     | 2 itgb5       | 4 ABLIM2                    | 1 grip1        | 2 gapdhs                    | 2 |
| sephs1        | 1 HAPLN1                    | 2 jarid2      | 4 CSK21                     | 1 HMCS1        | 2 golga5                    | 2 |
| slc39a7       | 1 HDGFL3                    | 2 NUCB2       | 4 elavl2                    | 1 IPKA         | 2 GTDC1                     | 2 |
| tnikb         | 1 HOME3                     | 2 PCDHGA2     | 4 LYSC                      | 1 itpkb        | 2 GFI1R                     | 2 |
| ZN235         | 1 LOC103459553              | 2 rabgap1     | 4 MAPK9                     | 1 KCAB1        | 2 KCNJ9                     | 2 |
|               | lrrtm4l1                    | 2 rpl14       | 4 MSTRG.8823                | 1 LBH          | 2 LOC103460906              | 2 |
|               | NPAS2                       | 2 SATT        | 4 ntmt1                     | 1 LOC103476863 | 2 mkl2                      | 2 |
|               | NRP1A                       | 2 scai        | 4 PP2BA                     | 1 LORF2        | 2 nrg2                      | 2 |
|               | NSG2                        | 2 SCN5A       | 4 ppp1r13l                  | 1 LRRF2        | 2 NTM1B                     | 2 |
|               | PHF1                        | 2 tbl1xr1     | 4 PTGR2                     | 1 map6d1       | 2 polr1b                    | 2 |
|               | ptprd                       | 2 tmem145     | 4 thumpd2                   | 1 mkl2         | 2 ranbp3                    | 2 |
|               | st3gal4                     | 2 tnrc6b      | 4 TRAPPC1                   | 1 nfe2l1       | 2 RL19                      | 2 |
|               | ube2v2                      | 2 ZN865       | 4 TSP1L                     | 1 nlg2         | 2 rpl37a                    | 2 |
|               | ALDH18A1                    | 1 aars2       | 3 zmynd12                   | 1 NPRL3        | 2 SEPTIN12                  | 2 |
|               | APBA1                       | 1 ache        | 3                           | 1 pfkp         | 2 SFMBT1                    | 2 |
|               | cfap99                      | 1 AGRN        | 3                           | 1 PKIA         | 2 sin3a                     | 2 |
|               | CHD8                        | 1 AMT         | 3                           | 1 PRC1         | 2 TLE4                      | 2 |
|               | cpeb4                       | 1 ANK2        | 3                           | 1 prickle2     | 2 TRI39                     | 2 |
|               | EIF4G3                      | 1 ASAP2       | 3                           | 1 rexo1        | 2 abcg4                     | 1 |
|               | GLSK                        | 1 ATX1        | 3                           | 1 rpl15        | 2 cdc42bpb                  | 1 |
|               | GLUL                        | 1 bdnf        | 3                           | 1 SURF2        | 2 COR1A                     | 1 |
|               | GNG7                        | 1 bicd2       | 3                           | 1 thap5        | 2 FACR1                     | 1 |
|               | heatr5b                     | 1 cacna1a     | 3                           | 1 tnikb        | 2 gdpd2                     | 1 |
|               | ITPR1                       | 1 cdipt       | 3                           | 1 TRI39        | 2 IL1A                      | 1 |
|               | kiaa2026                    | 1 COX18       | 3                           | 1 TSPAN7       | 2 MRPL55                    | 1 |
|               | LOC103464370                | 1 cpsf6       | 3                           | 1 TUFT1        | 2 MSTRG.24943               | 1 |
|               | LOC103477566                | 1 csgalnact2  | 3                           | 1 ZFP2         | 2 ncoa4                     | 1 |
|               | NCAM2                       | 1 DDX42       | 3                           | 1 atp2b2       | 1 orc4                      | 1 |
|               | NR1AA                       | 1 dnmbp       | 3                           | 1 CNGB1        | 1 PARVA                     | 1 |
|               | nt5e                        | 1 dtnb        | 3                           | 1 DCNL1        | 1 pfkfb2                    | 1 |
|               | orc5                        | 1 fau         | 3                           | 1 elavl4       | 1 pla1a                     | 1 |
|               | ptprm                       | 1 FLRT1       | 3                           | 1 GBA2         | 1 PTGR2                     | 1 |
|               | ranbp3                      | 1 GRIA2       | 3                           | 1 grk4         | 1 RHG22                     | 1 |
|               | rpl8                        | 1 HACE1       | 3                           | 1 MSTRG.8823   | 1                           |   |
|               | RTase                       | 1 HDAC4       | 3                           | 1 MYO1E        | 1                           |   |

|                |   |               |   |                |   |
|----------------|---|---------------|---|----------------|---|
| <i>SRSF5</i>   | 1 | HS6ST2        | 3 | <i>ran</i>     | 1 |
| <i>TSC22D2</i> | 1 | hypk          | 3 | <i>RL19</i>    | 1 |
| <i>vps45</i>   | 1 | KCD15         | 3 | <i>rundc3a</i> | 1 |
| <i>XPC</i>     | 1 | MAGI2         | 3 | <i>SCHIP1</i>  | 1 |
|                |   | nell1         | 3 | <i>shroom2</i> | 1 |
|                |   | NTRK2         | 3 | <i>SYPH</i>    | 1 |
|                |   | NYNRIN        | 3 | <i>tanc2</i>   | 1 |
|                |   | P85B          | 3 | <i>znf512</i>  | 1 |
|                |   | PMM2          | 3 |                |   |
|                |   | psmc3         | 3 |                |   |
|                |   | RAC3          | 3 |                |   |
|                |   | RADIL         | 3 |                |   |
|                |   | <i>RL19</i>   | 3 |                |   |
|                |   | rpl10         | 3 |                |   |
|                |   | rpl11         | 3 |                |   |
|                |   | rpl30         | 3 |                |   |
|                |   | rpl7a         | 3 |                |   |
|                |   | rps3a         | 3 |                |   |
|                |   | SCAM5         | 3 |                |   |
|                |   | slc1a1        | 3 |                |   |
|                |   | SPAG9         | 3 |                |   |
|                |   | sptbn4        | 3 |                |   |
|                |   | SYGP1         | 3 |                |   |
|                |   | TACC1         | 3 |                |   |
|                |   | tmem19        | 3 |                |   |
|                |   | TRPC4AP       | 3 |                |   |
|                |   | UBA3          | 3 |                |   |
|                |   | USP9X         | 3 |                |   |
|                |   | wdr18         | 3 |                |   |
|                |   | zcchc6        | 3 |                |   |
|                |   | zyg11b        | 3 |                |   |
|                |   | AN13C         | 2 |                |   |
|                |   | AN32E         | 2 |                |   |
|                |   | atg3          | 2 |                |   |
|                |   | B3GL2         | 2 |                |   |
|                |   | CHD5          | 2 |                |   |
|                |   | csmd2         | 2 |                |   |
|                |   | EF1A1         | 2 |                |   |
|                |   | EVL           | 2 |                |   |
|                |   | GNAQ          | 2 |                |   |
|                |   | <i>golga5</i> | 2 |                |   |
|                |   | GRM5          | 2 |                |   |
|                |   | KCNH8         | 2 |                |   |
|                |   | kdm4a         | 2 |                |   |
|                |   | LAP2          | 2 |                |   |
|                |   | LOC103460099  | 2 |                |   |
|                |   | LOC103467299  | 2 |                |   |
|                |   | lrrc75a       | 2 |                |   |
|                |   | LRRT2         | 2 |                |   |
|                |   | marcks1       | 2 |                |   |
|                |   | <i>ncln</i>   | 2 |                |   |
|                |   | NLGN1         | 2 |                |   |
|                |   | NOVA1         | 2 |                |   |
|                |   | NTL9          | 2 |                |   |
|                |   | PAK1IP1       | 2 |                |   |
|                |   | pdfn6         | 2 |                |   |
|                |   | PHLPP2        | 2 |                |   |
|                |   | ppargc1b      | 2 |                |   |
|                |   | PPP2R5C       | 2 |                |   |
|                |   | prkca         | 2 |                |   |
|                |   | RL12          | 2 |                |   |
|                |   | rpl31         | 2 |                |   |
|                |   | rplp0         | 2 |                |   |
|                |   | S4A11         | 2 |                |   |
|                |   | SCN8A         | 2 |                |   |
|                |   | SI1L1         | 2 |                |   |
|                |   | slc1a2        | 2 |                |   |
|                |   | slc6a11       | 2 |                |   |
|                |   | spen          | 2 |                |   |
|                |   | SPTBN4        | 2 |                |   |

|  |              |   |  |
|--|--------------|---|--|
|  | TESK2        | 2 |  |
|  | TMTC3        | 2 |  |
|  | TRPM6        | 2 |  |
|  | uba52        | 2 |  |
|  | UBC2         | 2 |  |
|  | UNC13A       | 2 |  |
|  | XPO1         | 2 |  |
|  | ZN665        | 2 |  |
|  | ZNF521       | 2 |  |
|  | znf839       | 2 |  |
|  | AHNK         | 1 |  |
|  | BMT16        | 1 |  |
|  | BSN          | 1 |  |
|  | ctsa         | 1 |  |
|  | elavl2       | 1 |  |
|  | GP155        | 1 |  |
|  | GPR37        | 1 |  |
|  | hspd1        | 1 |  |
|  | KCAB1        | 1 |  |
|  | LOC103460110 | 1 |  |
|  | LOC103460981 | 1 |  |
|  | Irig1        | 1 |  |
|  | lrrc8a       | 1 |  |
|  | MYT1         | 1 |  |
|  | ndufa11      | 1 |  |
|  | PLXA2        | 1 |  |
|  | ptprb        | 1 |  |
|  | radil        | 1 |  |
|  | SHSA6        | 1 |  |
|  | snrk         | 1 |  |
|  | snrpa        | 1 |  |
|  | SNTG1        | 1 |  |
|  | tnikb        | 1 |  |
|  | TRI46        | 1 |  |

**Supplementary Table 9.** Summary of genes found to be differentially co-expressed and differentially expressed in differential coexpression analyses and GO enrichment analyses in tests respectively, performed to evaluate the genomic response in midbrain, optic tectum and telencephalon in polarization-selected and control lines of female guppies when swimming with a group of conspecifics versus when swimming alone (two samples per treatment and brain region obtained by pooling brain tissue from 5 individuals each, n = 24 pools).

| <b>COMMON DE &amp; DC GENES</b>               |              |                             |                                                               |                                              |              |
|-----------------------------------------------|--------------|-----------------------------|---------------------------------------------------------------|----------------------------------------------|--------------|
| OPTIC TECTUM                                  |              | TELENCEPHALON               |                                                               | MIDBRAIN                                     |              |
| CONTROL                                       | POLARIZATION | CONTROL                     | POLARIZATION                                                  | CONTROL                                      | POLARIZATION |
| 3                                             | 0            | 2                           | 4                                                             | 3                                            | 0            |
| <i>SEPHS1</i><br><i>ZN235</i><br><i>ARL4A</i> |              | <i>NCLN</i><br><i>PTPRB</i> | <i>LRRC24</i><br><i>PTPRS</i><br><i>KHDR2</i><br><i>PP2BA</i> | <i>IGF1R</i><br><i>ITPKB</i><br><i>TANC2</i> |              |

**Supplementary Table 10.** KEGG pathways of interest associated in BFDCA differentially coexpressed gene pairs obtained in differential coexpression analyses performed to evaluate the genomic response in midbrain, optic tectum and telencephalon in polarization-selected and control lines of female guppies when swimming with a group of conspecifics versus when swimming alone (two samples per treatment and brain region obtained by pooling brain tissue from 5 individuals each, n = 24 pools). Only showing pathways and select genes relevant to neural processes associated with behaviour that presented a FDR corrected p-value <0.05

| <b>OPTIC TECTUM</b>                                                                 |                                                  |
|-------------------------------------------------------------------------------------|--------------------------------------------------|
| <b>Polarization-selection lines</b>                                                 |                                                  |
| Pathways of interest (enriched)                                                     | Genes of interest                                |
| Glutamatergic synapse                                                               | GLUL,GNG7,ITPR1                                  |
| Long-term depression                                                                | GRID2,ITPR1                                      |
| Dopaminergic synapse                                                                | GNG7,ITPR1                                       |
| GABAergic synapse                                                                   | GLUL,GNG7                                        |
| Cholinergic synapse                                                                 | GNG7,ITPR1                                       |
| Serotonergic synapse                                                                | GNG7,ITPR1                                       |
| <b>Control lines</b>                                                                |                                                  |
| Signal Transduction of SIP Receptor                                                 | MAPK6                                            |
| <b>TELENCEPHALON</b>                                                                |                                                  |
| <b>Polarization-selection lines</b>                                                 |                                                  |
| Pathways of interest (enriched)                                                     | Genes of interest                                |
| FoxO signaling pathway                                                              | GRM1,MAPK9                                       |
| Phospholipase D signaling pathway                                                   | GRM1,RHEB                                        |
| Synaptic vesicle cycle                                                              | SLC17A6,RAB3A                                    |
| Glutamatergic synapse                                                               | SLC17A6,GRM1                                     |
| JNK (c-Jun kinases) phosphorylation and activation mediated by activated human TAK1 | MAPK9<br>RAB3A                                   |
| GABA synthesis, release, reuptake and degradation                                   | RAB3A                                            |
| Glutamate Neurotransmitter Release Cycle                                            |                                                  |
| <b>Control lines</b>                                                                |                                                  |
| Glutamatergic synapse                                                               | CACNA1A,GRIA2,SLC1A1,GNAQ,GRM5,PRKCA,SLC1A2      |
| Synaptic vesicle cycle                                                              | CACNA1A,SLC1A1,SLC1A2,SLC6A11,UNC13A             |
| PI3K-Akt signaling pathway                                                          | PKN1,ITGB5,BDNF,MAGI2,NTRK2,PHLPP2,PPP2R5C,PRKCA |
| Long-term depression                                                                | CACNA1A,GRIA2,GNAQ,PRKCA                         |
| Dopaminergic synapse                                                                | CACNA1A,GRIA2,GNAQ,PPP2R5C,PRKCA                 |
| Long-term potentiation                                                              | GRIA2,GNAQ,GRM5,PRKCA                            |
| Cholinergic synapse                                                                 | ACHE,CACNA1A,GNAQ,PRKCA                          |
| Ras signaling pathway                                                               | HTR7,BDNF,NTRK2,RAC3,PRKCA                       |
| <b>MIDBRAIN</b>                                                                     |                                                  |
| <b>Polarization-selection lines</b>                                                 |                                                  |
| EGFR tyrosine kinase inhibitor resistance                                           | PDGFRB,IGF1R,NRG2                                |
| Ras signaling pathway                                                               | PDGFRB,IGF1R,PLA1A                               |
| MAPK signaling pathway                                                              | PDGFRB,IGF1R,IL1A                                |
| AMPK signaling pathway                                                              | IGF1R,PFKFB2                                     |
| <b>Control lines</b>                                                                |                                                  |
| cAMP signaling pathway                                                              | PPARA,GRIA2,ATP2B2,CNGB1                         |



|                                                                         |                    |
|-------------------------------------------------------------------------|--------------------|
| Rap1 signaling pathway                                                  | MAGI1,IGF1R,RASSF5 |
| Long-term depression                                                    | IGF1R,GRIA2        |
| AMPK signaling pathway                                                  | IGF1R,PFKP         |
| cGMP-PKG signaling pathway                                              | ATP2B2,CNGB1       |
| Glutamate binding, activation of AMPA receptors and synaptic plasticity | GRIA2,GRIP1,TSPAN7 |

**Supplementary Table 11.** Gene Ontology (GO) terms of interest associated with BFDCA DC gene pairs

| <b>OPTIC TECTUM</b>                            |                                                                                                                                                                                 |
|------------------------------------------------|---------------------------------------------------------------------------------------------------------------------------------------------------------------------------------|
| <b>Polarization-selected lines</b>             |                                                                                                                                                                                 |
| <b>GO terms of interest (enriched)</b>         | <b>Genes of interest</b>                                                                                                                                                        |
| response to stimulus signaling                 | TLK2,RTN4,PARVA,PFKFB2,SHC3,TOM1L2,ASIC1,CDH6,GRID2,TSPAN8,CDK14,FOXP2,HDGFL3,NPAS2,NSG2,PHF1,PTPRD,ST3GAL4,UBE2V2,CHD8,CPEB4,GLUL,GNG7,ITPR1,NT5E,TPRM,SRSF5,TSC22D2,VPS45,XPC |
| response to stress                             | TLK2,RTN4,PARVA,PFKFB2,SHC3,TOM1L2,ASIC1,CDH6,GRID2,CDK14,HDGFL3,NSG2,PTPRD,APBA1,CHD8,CPEB4,GLUL,GNG7,ITPR1,NT5E,TPRM,XPC                                                      |
| signal transduction                            | TLK2,RTN4,ASIC1,TSPAN8,NPAS2,PHF1,ST3GAL4,UBE2V2,CPEB4,GLUL,ITPR1,NT5E,TSC22D2,VPS45,XPC                                                                                        |
| cell-cell signaling                            | TLK2,RTN4,SHC3,TOM1L2,ASIC1,CDH6,GRID2,CDK14,HDGFL3,NSG2,PTPRD,CHD8,CPEB4,GNG7,ITPR1,NT5E,TPRM,XPC                                                                              |
| response to external stimulus                  | TLK2,RTN4,ASIC1,GRID2,CDK14,PTPRD,APBA1,CHD8,GLUL,ITPR1,PARVA,SHC3,GRID2,TSPAN8,ST3GAL4,CHD8,CPEB4,GLUL,NT5E,TPRM,XPC                                                           |
| synapse                                        | RTN4,ASIC1,GRID2,KLHL17,HAPLN1,PTPRD,APBA1,CPEB4,GLUL,ITPR1,RPL8,VPS45                                                                                                          |
| postsynaptic density                           | RTN4,GRID2,KLHL17,CPEB4,ITPR1,RPL8                                                                                                                                              |
| asymmetric synapse                             | RTN4,GRID2,KLHL17,CPEB4,ITPR1,RPL8                                                                                                                                              |
| postsynaptic specialization                    | RTN4,GRID2,KLHL17,CPEB4,ITPR1,RPL8                                                                                                                                              |
| postsynapse                                    | RTN4,GRID2,KLHL17,APBA1,CPEB4,ITPR1,RPL8                                                                                                                                        |
| <b>Control lines</b>                           |                                                                                                                                                                                 |
| response to stimulus                           | CGAS,ABCA1,CENPS,STIMATE,BCL11B,DLGAP2,ENAH,MAPK6,TMBIM6,ADH5                                                                                                                   |
| positive regulation of cGMP-mediated signaling | CGAS                                                                                                                                                                            |
| neurogenesis                                   | BCL11B,ENAH,GBA2,MAPK6                                                                                                                                                          |
| response to L-glutamate                        | TMBIM6                                                                                                                                                                          |
| response to external stimulus                  | CGAS,ABCA1,BCL11B,ENAH,ADH5                                                                                                                                                     |
| regulation of signal transduction              | CGAS,ABCA1,STIMATE,DLGAP2,TMBIM6                                                                                                                                                |
| neurotransmitter reuptake                      | SLC29A2                                                                                                                                                                         |
| <b>TELENCEPHALON</b>                           |                                                                                                                                                                                 |
| <b>Polarization-selected lines</b>             |                                                                                                                                                                                 |

|                                                                                     |                                                                                                                                                    |
|-------------------------------------------------------------------------------------|----------------------------------------------------------------------------------------------------------------------------------------------------|
| L-glutamate transmembrane transporter activity                                      | SLC17A6, GRM1                                                                                                                                      |
| neurotransmitter transmembrane transporter activity                                 | SLC17A6<br>GRM1                                                                                                                                    |
| glutamate receptor activity                                                         | GRM1                                                                                                                                               |
| postsynaptic neurotransmitter receptor activity                                     | SLC17A6, MACF1, RAB3A,                                                                                                                             |
| L-glutamate transmembrane transport                                                 | RAB3A, MACF1                                                                                                                                       |
| evoked neurotransmitter secretion                                                   | MAPK9                                                                                                                                              |
| protein localization to tricellular tight junction                                  | MAPK9                                                                                                                                              |
| JUN phosphorylation                                                                 | PTPRS                                                                                                                                              |
| regulation of cell junction assembly                                                | SLC17A6                                                                                                                                            |
| neurotransmitter loading into synaptic vesicle                                      | GRM1                                                                                                                                               |
| adenylate cyclase-inhibiting G protein-coupled glutamate receptor signaling pathway | SLC17A6                                                                                                                                            |
| neurotransmitter transport                                                          | GRM1, MACF1                                                                                                                                        |
| L-glutamate import across plasma membrane                                           | GRM1                                                                                                                                               |
| G protein-coupled glutamate receptor signaling pathway                              | MAPK9<br>PTPRS, TENM2, PTPRS, GRM1, MACF1, PNN,                                                                                                    |
| protein localization to cell-cell junction                                          | RAB3A, RHEB, RPL7, PPP1R13L                                                                                                                        |
| cell junction assembly                                                              | MTHFS<br>GRM1                                                                                                                                      |
| glutamate metabolic process                                                         |                                                                                                                                                    |
| glutamate receptor signaling pathway                                                |                                                                                                                                                    |
| clathrin-sculpted glutamate transport vesicle membrane                              | RAB3A<br>RAB3A                                                                                                                                     |
| clathrin-sculpted glutamate transport vesicle                                       | PNN                                                                                                                                                |
| exon-exon junction complex                                                          | PTPRS                                                                                                                                              |
| glutamatergic synapse                                                               |                                                                                                                                                    |
| <b>Control lines</b>                                                                |                                                                                                                                                    |
| high-affinity glutamate transmembrane transporter activity                          | SLC1A1,SLC1A2<br>SLC1A1,SLC1A2                                                                                                                     |
| glutamate:sodium symporter activity                                                 | KAT7,PKN1,SMARCA4,DVL1,GATAD2B,IER2,JARI                                                                                                           |
| aromatic compound biosynthetic process                                              | D2,SCAI,TBL1XR1,TNRC6B,AGRN,HDAC4,PMM2,P<br>SMC3,RPL10,TACC1,UBA3,USP9X,CHD5,KDM4A,P<br>PARGC1B,SPEN,UBA52,XPO1,ZNF521,ELAVL2,GP<br>R37,HSPD1,MYT1 |
| synapse organization                                                                | DVL1,ACHE,AGRN,BDNF,NTRK2,SLC1A1,GRM5,N                                                                                                            |
| glutamate receptor signaling pathway                                                | LGN1,UNC13A,BSN                                                                                                                                    |
| neurotransmitter transport                                                          | GRIA2,SLC1A1,GNAQ,GRM5<br>DVL1,SLC1A1,NLGN1,SLC1A2,SLC6A11,UNC13A                                                                                  |
| <b>MIDBRAIN</b>                                                                     |                                                                                                                                                    |
| <b>Polarization-selected lines</b>                                                  |                                                                                                                                                    |

|                                              |                                                                                                                                  |
|----------------------------------------------|----------------------------------------------------------------------------------------------------------------------------------|
| protein tyrosine kinase activity             | PDGFRB,IGF1R                                                                                                                     |
| cellular aromatic compound metabolic process | CPSF3,POU4F1,HES6,NUP205,OTP,PDGFRB,CTPS1,<br>GAPDHS,MRTFB,POLR1B,RPL19,RPL37A,SFMBT1,<br>aromatic compound biosynthetic process |
| aromatic compound biosynthetic process       | SIN3A,TLE4,IL1A,NCOA4,ORC4,PFKFB2<br>CPSF3,POU4F1,HES6,OTP,PDGFRB,CTPS1,MRTFB,<br>inactivation of MAPKK activity                 |
| inactivation of MAPKK activity               | POLR1B,SFMBT1,SIN3A,TLE4,IL1A,NCOA4                                                                                              |
| signal transduction                          | IGF1R<br>POU4F1,PDGFRB,ARL6,CORO2A,IGF1R,NRG2,TLE<br>4,TRIM39,CDC42BPB,IL1A,NCOA4                                                |
| equilibrioception                            | 4,TRIM39,CDC42BPB,IL1A,NCOA4                                                                                                     |
| regulation of signal transduction            | POU4F1                                                                                                                           |
| suckling behavior                            | POU4F1,PDGFRB,IGF1R,NRG2,TLE4,TRIM39,IL1A<br>POU4F1                                                                              |
| <b>Control lines</b>                         |                                                                                                                                  |
| signaling receptor activity                  | CSK,IGF1R,PPARA,GRIA2,NLGN2                                                                                                      |
| signal transduction                          | MAGI1,CSK,IGF1R,PPARA,HMGA2,RASSF5,DCTN1<br>behavior                                                                             |
| behavior                                     | ,DOCK9,GRIA2,GRIP1,ITPKB,LBH,NLGN2,NPRL3,P<br>glutamatergic synapse                                                              |
| glutamatergic synapse                        | RICKLE2,TUFT1,CNGB1,GRK4,MYO1E,RUNDC3A,<br>AMPA glutamate receptor complex                                                       |
| AMPA glutamate receptor complex              | SCHIP1<br>PPARA,DCTN1,NLGN2,ELAVL4<br>GRIP1,ATP2B2,ELAVL4<br>GRIA2                                                               |

## Supplementary References

- 1 - Mi, H., Muruganujan, A., Casagrande, J. T. & Thomas, P. D. Large-scale gene function analysis with the PANTHER classification system. *Nature Protocols* 2013 8:8 **8**, 1551–1566 (2013).
- 2 - Supek, F., Bošnjak, M., Škunca, N. & Šmuc, T. REVIGO summarizes and visualizes long lists of gene ontology terms. *PLoS One* **6**, (2011).
